# Supplementary material
Source: publisher site journal article supplement (https://www.spandidos-publications.com/8407/downloadSupplementary)
Supplement: Supplementary file 1 [file downloadSupplementary]

## Sheet: Sheet1
Table SVI. Glycolysis pathway enrichment score.
BIOCARTA_GLYCOLYSIS_PATHWAY	GOBP_GLYCOLYTIC_PROCESS_THROUGH_FRUCTOSE_6_PHOSPHATE	GOBP_GLYCOLYTIC_PROCESS_THROUGH_GLUCOSE_6_PHOSPHATE	HALLMARK_GLYCOLYSIS	KEGG_GLYCOLYSIS_GLUCONEOGENESIS	KEGG_MEDICUS_REFERENCE_GLYCOLYSIS	MOOTHA_GLYCOLYSIS	REACTOME_GLYCOLYSIS	WP_GLYCOLYSIS_AND_GLUCONEOGENESIS
0.585171	0.312042	0.361288	0.330765	0.298431	0.459967	0.373114	0.289445	0.322309
0.944811	0.574023	0.60886	0.430291	0.498737	0.639848	0.630001	0.441059	0.584717
0.724824	0.491392	0.610594	0.411545	0.430102	0.414141	0.602195	0.387816	0.516583
0.58628	0.456201	0.452649	0.368361	0.473213	0.423216	0.47147	0.452379	0.390727
0.830993	0.531138	0.592691	0.452175	0.466914	0.496261	0.534074	0.427261	0.543778
0.758714	0.535473	0.582082	0.45634	0.433823	0.474821	0.511046	0.497546	0.495025
0.738771	0.508584	0.548556	0.366123	0.363803	0.427109	0.397315	0.387818	0.43139
0.882042	0.44457	0.44394	0.428833	0.392629	0.412812	0.473126	0.394207	0.416419
0.768593	0.582006	0.670718	0.417477	0.441315	0.546832	0.538826	0.502743	0.465426
0.867989	0.598731	0.681134	0.537852	0.495459	0.577414	0.554729	0.588295	0.603254
0.660263	0.431376	0.454585	0.403741	0.443059	0.48294	0.470615	0.419504	0.386781
0.892572	0.447127	0.417128	0.435459	0.448706	0.49951	0.503289	0.385413	0.442112
0.781775	0.42844	0.503817	0.416295	0.378234	0.437182	0.570528	0.438594	0.464254
0.864284	0.628118	0.616979	0.385829	0.45867	0.491926	0.525258	0.558792	0.480763
0.776858	0.454655	0.465495	0.400726	0.435818	0.589294	0.523873	0.512833	0.502119
0.836418	0.420021	0.440661	0.396348	0.450339	0.525793	0.548065	0.517572	0.530935
0.916295	0.649804	0.732288	0.495334	0.528601	0.588385	0.584804	0.633322	0.613678
0.69983	0.267493	0.292958	0.326281	0.268172	0.309661	0.351758	0.427247	0.290745
0.957068	0.475691	0.482274	0.374713	0.439612	0.446591	0.504745	0.42506	0.494266
0.757155	0.625376	0.74227	0.453361	0.49535	0.473215	0.585412	0.634355	0.54581
0.822932	0.551656	0.609271	0.445622	0.425271	0.543672	0.595433	0.511807	0.471781
0.748112	0.450002	0.50008	0.325359	0.334353	0.428888	0.427884	0.333856	0.393761
0.951779	0.527748	0.549918	0.404218	0.448734	0.505528	0.476121	0.472522	0.465215
0.915294	0.658849	0.679541	0.512044	0.557729	0.641184	0.601561	0.588239	0.571258
0.704812	0.454326	0.56676	0.359665	0.38842	0.463181	0.490826	0.428221	0.493327
0.948534	0.676132	0.738591	0.530814	0.48232	0.637828	0.630575	0.414268	0.608812
0.530927	0.569965	0.524034	0.400098	0.379244	0.506801	0.434042	0.422279	0.523633
0.934802	0.362722	0.379325	0.335518	0.321177	0.423097	0.315225	0.494131	0.373272
0.863473	0.492709	0.4541	0.499301	0.41687	0.451822	0.457761	0.508929	0.477437
0.835435	0.520568	0.554638	0.404781	0.450069	0.500438	0.533079	0.457036	0.503605
0.787006	0.546522	0.629416	0.430082	0.380514	0.523808	0.468392	0.543502	0.498086
0.662318	0.443957	0.470325	0.299433	0.367617	0.493034	0.430179	0.389026	0.373282
0.72892	0.377338	0.382032	0.39287	0.342167	0.440531	0.44377	0.380561	0.358655
0.813872	0.404153	0.388868	0.351089	0.420867	0.416103	0.394717	0.33807	0.415345
0.78923	0.513911	0.538212	0.350386	0.415057	0.534719	0.566597	0.511399	0.429789
0.525777	0.557045	0.525285	0.415577	0.404295	0.433849	0.451617	0.426158	0.405546
0.689289	0.471286	0.436015	0.380553	0.4082	0.429416	0.530776	0.357593	0.417728
0.66367	0.479149	0.484127	0.359909	0.34941	0.458106	0.434581	0.390626	0.403072
0.891291	0.470867	0.472247	0.344751	0.438819	0.465983	0.503587	0.327725	0.467954
0.553486	0.369389	0.35589	0.401321	0.34512	0.405378	0.476294	0.326819	0.419528
0.908867	0.282791	0.363908	0.338069	0.310021	0.284812	0.366521	0.332331	0.322333
0.92964	0.356623	0.381913	0.408403	0.384887	0.473496	0.429172	0.41056	0.394745
0.783073	0.4546	0.471676	0.462767	0.447698	0.475368	0.515694	0.573865	0.542566
0.947217	0.537541	0.618017	0.455532	0.411332	0.477106	0.548744	0.365063	0.478303
0.845619	0.350848	0.34737	0.340528	0.414505	0.527609	0.499079	0.369739	0.393185
0.909816	0.540278	0.497128	0.452264	0.457254	0.440816	0.675285	0.541435	0.505592
0.873879	0.45565	0.435603	0.331769	0.315324	0.500694	0.437952	0.438599	0.398534
0.652553	0.388013	0.390241	0.431418	0.426494	0.470239	0.461389	0.512019	0.429743
0.53441	0.420157	0.463091	0.377909	0.399043	0.521695	0.487859	0.363388	0.390274
0.728692	0.532428	0.603034	0.389864	0.410924	0.540986	0.531219	0.54752	0.513561
0.51491	0.452735	0.454518	0.389804	0.379006	0.42772	0.376056	0.439736	0.423341
0.90662	0.463295	0.475709	0.37289	0.457297	0.479179	0.624409	0.444136	0.56536
0.69824	0.550718	0.602497	0.474333	0.533512	0.539346	0.57469	0.528578	0.522848
0.793706	0.476728	0.486189	0.387001	0.344578	0.44857	0.653724	0.391259	0.475842
0.539017	0.471098	0.486778	0.393672	0.407612	0.45255	0.462334	0.392921	0.401964
0.55036	0.376959	0.399815	0.311624	0.360573	0.373483	0.434165	0.360917	0.375946
0.942897	0.630989	0.681574	0.48438	0.460013	0.511976	0.62329	0.415845	0.500083
0.754462	0.494163	0.503018	0.376789	0.43078	0.404376	0.521893	0.411398	0.385628
0.601089	0.41782	0.473308	0.410712	0.466038	0.428944	0.456335	0.482373	0.390696
0.910904	0.542989	0.555109	0.454176	0.450071	0.545558	0.482743	0.4882	0.557672
0.71081	0.502307	0.468857	0.438257	0.384027	0.348972	0.49724	0.373547	0.352855
0.935663	0.438498	0.471609	0.441595	0.497154	0.431873	0.57274	0.350383	0.462307
0.745445	0.506654	0.545285	0.356915	0.412976	0.565603	0.438854	0.41481	0.569075
0.753117	0.51228	0.583466	0.492845	0.460632	0.584277	0.557769	0.535515	0.483677
0.83965	0.513324	0.60582	0.450862	0.419752	0.587938	0.53565	0.519003	0.559341
0.622915	0.591065	0.598381	0.499705	0.474957	0.51728	0.524979	0.572027	0.500708
0.675799	0.533273	0.511378	0.462729	0.466222	0.569736	0.46174	0.563217	0.573619
0.694662	0.488518	0.522477	0.365853	0.42997	0.476144	0.43147	0.407265	0.398776
0.933995	0.477889	0.483585	0.407005	0.411294	0.415857	0.506651	0.382991	0.455875
0.857946	0.433583	0.426914	0.400943	0.392914	0.398925	0.407957	0.501908	0.384856
0.974241	0.569066	0.679702	0.39723	0.385539	0.620476	0.492393	0.386726	0.49733
0.550939	0.472823	0.469964	0.404475	0.424238	0.420536	0.521625	0.443408	0.387206
0.793889	0.52182	0.615689	0.404597	0.440377	0.539688	0.437322	0.489627	0.516659
0.7964	0.601085	0.674502	0.475573	0.492799	0.559897	0.548623	0.472184	0.554112
0.515189	0.411529	0.376602	0.395954	0.377918	0.452824	0.43352	0.387653	0.372758
0.646434	0.417731	0.413129	0.35083	0.361184	0.392132	0.396575	0.370462	0.310664
0.658402	0.509171	0.479295	0.426387	0.447785	0.411398	0.473582	0.57758	0.435673
0.512653	0.514101	0.616958	0.508475	0.486028	0.545548	0.500413	0.63201	0.503653
0.809342	0.598053	0.635215	0.425406	0.509436	0.610801	0.510246	0.5452	0.577469
0.802774	0.381397	0.433205	0.435449	0.444457	0.451231	0.472521	0.397339	0.421845
0.921205	0.36637	0.38006	0.376785	0.340243	0.316373	0.44993	0.371335	0.369775
0.690652	0.421353	0.49359	0.40165	0.344255	0.476123	0.446899	0.546206	0.428936
0.77461	0.647578	0.655075	0.517321	0.524091	0.520358	0.688087	0.598934	0.584671
0.802265	0.485125	0.532331	0.434265	0.414117	0.504806	0.580359	0.470547	0.446778
0.767884	0.645843	0.662806	0.58422	0.557333	0.568588	0.620786	0.610344	0.57682
0.823547	0.486988	0.510445	0.389088	0.42654	0.544772	0.493355	0.427171	0.555261
0.552028	0.472192	0.516752	0.37256	0.404208	0.508192	0.494026	0.508813	0.408597
0.959403	0.431919	0.530761	0.42874	0.42853	0.448326	0.470092	0.381099	0.419475
0.98727	0.674129	0.693556	0.648722	0.634126	0.635626	0.715942	0.594331	0.69347
0.958718	0.72001	0.755162	0.623215	0.623362	0.620886	0.734273	0.565471	0.69709
0.742089	0.360541	0.344953	0.361578	0.354466	0.362062	0.329904	0.35405	0.372298
0.780404	0.710119	0.732343	0.474124	0.516351	0.574331	0.598735	0.422338	0.629413
0.636067	0.574348	0.527658	0.381555	0.341465	0.388978	0.460184	0.312208	0.364096
0.757997	0.483534	0.479997	0.500056	0.479619	0.57554	0.540082	0.485269	0.529917
0.779122	0.550703	0.554438	0.43819	0.428761	0.437446	0.514725	0.442814	0.456097
0.755838	0.399912	0.416977	0.357561	0.441696	0.421895	0.444768	0.336885	0.409794
0.750553	0.489619	0.520614	0.378372	0.47517	0.447257	0.547619	0.4091	0.443682
0.798169	0.585772	0.626364	0.458398	0.447733	0.523914	0.487633	0.429078	0.477786
0.654843	0.346269	0.320912	0.335939	0.375123	0.42762	0.444598	0.389155	0.352293
0.634719	0.473802	0.558267	0.4239	0.474437	0.497833	0.453004	0.462576	0.474852
0.873784	0.573172	0.608365	0.481828	0.474546	0.4935	0.631756	0.503988	0.514146
0.767771	0.545904	0.534687	0.498736	0.491964	0.521029	0.502173	0.559446	0.501259
0.580117	0.536978	0.498049	0.36882	0.418967	0.430552	0.461172	0.412713	0.436174
0.763275	0.412037	0.461465	0.297103	0.356725	0.501033	0.516321	0.379892	0.423141
0.840509	0.427069	0.423625	0.420603	0.45704	0.533678	0.515719	0.439707	0.488014
0.941879	0.48625	0.557818	0.50619	0.529271	0.531034	0.597634	0.552454	0.517939
0.470648	0.483952	0.506134	0.363712	0.455614	0.58917	0.563964	0.429749	0.466969
0.580896	0.442953	0.510099	0.398503	0.410171	0.454792	0.540405	0.396463	0.455769
0.805452	0.5315	0.549181	0.474034	0.488969	0.501487	0.605616	0.493309	0.518879
0.968112	0.618186	0.669503	0.367274	0.461997	0.494497	0.566018	0.377565	0.476016
0.572369	0.462469	0.473927	0.417492	0.437029	0.475994	0.547171	0.386419	0.420218
0.764476	0.518692	0.54833	0.376189	0.400975	0.441233	0.490627	0.419698	0.492988
0.955382	0.609787	0.679383	0.479041	0.44343	0.518181	0.550262	0.512113	0.513207
0.958139	0.468689	0.55726	0.378239	0.398617	0.476869	0.40763	0.397332	0.437899
0.65722	0.406574	0.451938	0.371181	0.39826	0.443912	0.418052	0.420804	0.381051
0.919475	0.568733	0.613627	0.431744	0.417047	0.614273	0.643106	0.374635	0.521728
0.887168	0.548969	0.551097	0.395911	0.501249	0.486158	0.46454	0.400653	0.477149
0.683701	0.42049	0.45167	0.391085	0.359465	0.403954	0.44928	0.360011	0.458001
0.779789	0.499133	0.62883	0.379571	0.414681	0.510899	0.502816	0.474452	0.470686
0.796104	0.422125	0.484751	0.313022	0.395851	0.386794	0.469738	0.334468	0.33483
0.520228	0.385606	0.4374	0.385859	0.342614	0.360723	0.413279	0.455207	0.375937
0.660211	0.450509	0.452371	0.382528	0.379107	0.469885	0.521828	0.468527	0.412925
0.867656	0.482281	0.482658	0.421698	0.442864	0.504955	0.506958	0.420492	0.474967
0.870623	0.496958	0.525244	0.438648	0.436799	0.499065	0.510321	0.443945	0.477647
0.762905	0.493159	0.57124	0.423672	0.432426	0.645188	0.523219	0.374602	0.549427
0.805984	0.449289	0.501335	0.452985	0.425758	0.524083	0.506796	0.424142	0.495614
0.887375	0.585255	0.646485	0.507414	0.571529	0.618905	0.630145	0.512462	0.629824
0.772221	0.448947	0.466028	0.472964	0.396936	0.458985	0.45039	0.434675	0.458146
0.680401	0.329795	0.300296	0.31932	0.340637	0.432121	0.363567	0.365337	0.319358
0.602168	0.569844	0.638623	0.355681	0.434579	0.598303	0.60601	0.447669	0.499486
0.841031	0.487343	0.488852	0.445749	0.43444	0.460266	0.478413	0.425517	0.451981
0.934276	0.460706	0.460674	0.384816	0.337766	0.454065	0.485916	0.437815	0.421879
0.697707	0.475084	0.461967	0.455177	0.4192	0.523197	0.530507	0.456973	0.434952
0.886269	0.516626	0.550556	0.478662	0.483987	0.56809	0.561069	0.638689	0.515624
0.796804	0.525841	0.508586	0.406113	0.407081	0.516029	0.558565	0.454357	0.386744
0.595979	0.469019	0.471361	0.411621	0.465909	0.48146	0.535074	0.412869	0.451331
0.530305	0.346068	0.396567	0.412871	0.353253	0.371445	0.445721	0.424846	0.360536
0.964583	0.601718	0.647286	0.393774	0.417433	0.616186	0.489198	0.458653	0.415631
0.769538	0.630078	0.595625	0.533989	0.473652	0.481771	0.579737	0.459901	0.556844
0.735926	0.526464	0.606937	0.484026	0.504956	0.579463	0.604912	0.412759	0.612696
0.737805	0.455129	0.495633	0.358303	0.433984	0.512163	0.47413	0.449872	0.416833
0.766971	0.50294	0.529715	0.374684	0.351748	0.446942	0.474678	0.360501	0.383653
0.845215	0.567689	0.577418	0.494571	0.537963	0.461743	0.605086	0.531186	0.530069
0.665268	0.45008	0.414809	0.364035	0.401651	0.347284	0.45499	0.325806	0.368128
0.778367	0.488619	0.517925	0.380012	0.382927	0.46961	0.506989	0.348267	0.435057
0.802889	0.426579	0.474424	0.428839	0.415904	0.538802	0.482623	0.484503	0.415768
0.606565	0.537696	0.567221	0.35737	0.364844	0.445578	0.431258	0.367517	0.439208
0.941493	0.714285	0.747151	0.492419	0.544483	0.585363	0.644376	0.690836	0.547362
0.749635	0.579814	0.662779	0.444373	0.439839	0.590306	0.495284	0.466092	0.424374
0.648522	0.361676	0.421689	0.378618	0.382169	0.372683	0.469249	0.340631	0.351783
0.786598	0.591972	0.590391	0.474273	0.496735	0.532227	0.516255	0.64256	0.518868
0.613756	0.347739	0.364011	0.378874	0.441725	0.517906	0.491979	0.395228	0.406629
0.889464	0.602323	0.654016	0.472864	0.476919	0.604197	0.515427	0.399607	0.568189
0.779456	0.436344	0.403292	0.36385	0.300511	0.380114	0.404829	0.394575	0.3653
0.736997	0.594303	0.609129	0.535067	0.520731	0.519104	0.476014	0.658798	0.543899
0.57733	0.460628	0.473245	0.331996	0.365816	0.430477	0.435736	0.432362	0.414195
0.816119	0.569472	0.618202	0.543603	0.46705	0.535721	0.486659	0.436529	0.520024
0.646479	0.439723	0.502168	0.442833	0.40882	0.433572	0.426378	0.373088	0.408786
0.704585	0.555659	0.602522	0.428878	0.474169	0.569032	0.5344	0.507554	0.489466
0.94406	0.510169	0.48828	0.290562	0.396754	0.540689	0.510641	0.462811	0.550899
0.601268	0.400065	0.412207	0.411608	0.426737	0.493174	0.423551	0.37122	0.433818
0.921668	0.384946	0.394611	0.322468	0.400336	0.46097	0.385881	0.292974	0.367065
0.666197	0.559102	0.546476	0.385771	0.449429	0.526642	0.490072	0.47021	0.488962
0.890162	0.515876	0.471519	0.419265	0.43124	0.470224	0.561643	0.463076	0.48924
0.805691	0.444805	0.454458	0.464293	0.387595	0.45853	0.555341	0.401251	0.417242
0.751484	0.431532	0.540141	0.446163	0.449156	0.502619	0.484639	0.447566	0.472528
0.866356	0.607864	0.644748	0.410192	0.43496	0.564764	0.650819	0.513401	0.497376
0.758244	0.475814	0.529501	0.421449	0.429484	0.5968	0.400017	0.467575	0.473722
0.724782	0.428548	0.45736	0.397292	0.37773	0.324844	0.48075	0.422629	0.42743
0.930237	0.624672	0.633242	0.427605	0.467665	0.681523	0.653597	0.49746	0.515149
0.953753	0.439241	0.463891	0.441075	0.435015	0.491319	0.486659	0.438508	0.465056
0.928499	0.600947	0.666511	0.514629	0.513323	0.545645	0.566164	0.560389	0.556163
0.51986	0.432284	0.446536	0.458959	0.464976	0.524025	0.540664	0.455911	0.498019
0.51295	0.409844	0.462429	0.360642	0.365478	0.397397	0.489598	0.340337	0.399255
0.762371	0.592871	0.637309	0.454861	0.43294	0.560808	0.472524	0.539495	0.438225
0.752818	0.522202	0.49652	0.381356	0.440087	0.469105	0.461055	0.466926	0.459975
0.747727	0.489916	0.527928	0.342832	0.336284	0.404008	0.372807	0.371581	0.39438
0.870059	0.463894	0.454229	0.311919	0.336426	0.437313	0.414933	0.446286	0.464863
0.818578	0.514057	0.591149	0.323717	0.386679	0.548733	0.56121	0.453357	0.398931
0.663898	0.450591	0.513179	0.408474	0.378051	0.59266	0.460665	0.521535	0.426881
0.792011	0.530522	0.542729	0.498587	0.459921	0.393603	0.575484	0.476666	0.527668
0.850922	0.366689	0.357368	0.355945	0.411272	0.380601	0.457404	0.444651	0.367179
0.892379	0.707112	0.695442	0.611035	0.63399	0.614898	0.755693	0.601003	0.674749
0.847638	0.455262	0.466492	0.348557	0.374209	0.365619	0.458469	0.28109	0.345308
0.620852	0.51419	0.527054	0.424549	0.412946	0.473561	0.496451	0.415359	0.424695
0.508955	0.421646	0.399802	0.479767	0.413732	0.418893	0.496668	0.428684	0.403219
0.664328	0.539114	0.526149	0.363876	0.360302	0.48028	0.582865	0.429542	0.441975
0.642878	0.56842	0.585259	0.40396	0.374674	0.529797	0.484271	0.459318	0.525927
0.785043	0.377609	0.395512	0.408581	0.413659	0.442728	0.450232	0.356959	0.471511
0.556154	0.580846	0.609081	0.406582	0.483758	0.505909	0.537954	0.461378	0.462443
0.651438	0.461424	0.418772	0.398951	0.404214	0.50893	0.472496	0.350831	0.417055
0.837267	0.450306	0.446415	0.333697	0.430079	0.476762	0.493129	0.358577	0.444403
0.567122	0.48235	0.493065	0.350204	0.354991	0.41953	0.500106	0.378761	0.355001
0.781721	0.656804	0.635102	0.572011	0.54285	0.550594	0.600165	0.595127	0.617393
0.818405	0.431359	0.401623	0.438634	0.44138	0.422712	0.367537	0.508615	0.477099
0.922599	0.461457	0.51821	0.425179	0.439518	0.436377	0.490877	0.434146	0.435208
0.974311	0.73957	0.769688	0.647709	0.607831	0.593203	0.642443	0.675	0.705928
0.766779	0.547559	0.618885	0.451351	0.484215	0.576353	0.560707	0.481483	0.520327
0.974785	0.559397	0.613767	0.434156	0.413888	0.497746	0.530626	0.561255	0.47364
0.663916	0.384342	0.404995	0.382702	0.361199	0.358224	0.436644	0.3425	0.352216
0.723589	0.486394	0.482891	0.437304	0.468592	0.456433	0.554361	0.485428	0.521101
0.859877	0.509651	0.543475	0.464443	0.524123	0.60949	0.593861	0.532149	0.562205
0.88827	0.611736	0.577404	0.475014	0.427706	0.549263	0.546724	0.345364	0.6233
0.688861	0.541884	0.594081	0.441492	0.393996	0.510444	0.432041	0.424836	0.454014
0.747006	0.477021	0.532748	0.416751	0.415424	0.559657	0.434596	0.454412	0.471739
0.558214	0.470543	0.52195	0.373331	0.43791	0.483449	0.487818	0.447962	0.478808
0.641457	0.352866	0.371807	0.382773	0.400923	0.402841	0.375943	0.342376	0.366743
0.855733	0.489685	0.528402	0.362698	0.44461	0.521849	0.538751	0.452056	0.535888
0.846411	0.608948	0.628606	0.37534	0.463668	0.626819	0.557931	0.4916	0.465056
0.453079	0.559082	0.625894	0.418069	0.448878	0.512025	0.501904	0.403138	0.497244
0.955838	0.424461	0.408069	0.363391	0.418165	0.436057	0.457063	0.409881	0.409292
0.951473	0.586456	0.611066	0.550019	0.542935	0.614802	0.685717	0.636753	0.615022
0.837542	0.491968	0.562222	0.44301	0.503008	0.56413	0.562329	0.485244	0.528929
0.993872	0.555718	0.60843	0.396727	0.493364	0.610922	0.61725	0.454415	0.519269
0.970764	0.614908	0.665205	0.477523	0.52567	0.571541	0.589242	0.402197	0.517086
0.846216	0.446357	0.470523	0.416341	0.412341	0.422185	0.397745	0.416826	0.385264
0.74892	0.367839	0.354005	0.33917	0.37952	0.411528	0.445677	0.410508	0.369183
0.903459	0.4487	0.554256	0.394931	0.438372	0.484016	0.501704	0.349157	0.432408
0.952836	0.560784	0.616025	0.422466	0.495416	0.629464	0.539815	0.553149	0.580214
0.710973	0.411919	0.470371	0.350066	0.342853	0.38092	0.478898	0.383603	0.393202
0.768657	0.389677	0.475188	0.375776	0.32785	0.395311	0.41757	0.359511	0.392839
0.823733	0.468468	0.477509	0.420412	0.395578	0.424223	0.543759	0.374693	0.383877
0.905128	0.472622	0.524563	0.434371	0.460758	0.575464	0.591951	0.389311	0.593965
0.82374	0.510605	0.593405	0.405302	0.388173	0.399066	0.450283	0.367172	0.467582
0.842019	0.494766	0.43983	0.504651	0.48579	0.36256	0.39409	0.443269	0.505231
0.750163	0.546597	0.620596	0.440188	0.466565	0.565191	0.557882	0.50591	0.50978
0.870097	0.638477	0.639858	0.529941	0.516509	0.45159	0.574982	0.569025	0.521232
0.940667	0.505199	0.561454	0.531121	0.522611	0.504029	0.507146	0.54286	0.562469
0.611988	0.483834	0.539541	0.410232	0.415465	0.505771	0.412367	0.418102	0.406752
0.895171	0.417709	0.430227	0.382355	0.404407	0.422933	0.475409	0.367663	0.378463
0.789991	0.525668	0.619163	0.436275	0.497002	0.607933	0.655202	0.513762	0.556855
0.616418	0.550812	0.575432	0.436397	0.456712	0.468169	0.499962	0.42208	0.526414
0.860681	0.41311	0.44466	0.415813	0.428909	0.4697	0.491678	0.349041	0.436462
0.737385	0.41723	0.475655	0.416447	0.443102	0.495371	0.480268	0.389389	0.46
0.868446	0.493813	0.55121	0.543463	0.471632	0.479987	0.548359	0.496527	0.541375
0.82455	0.605648	0.673723	0.51615	0.540202	0.571035	0.655694	0.486286	0.580018
0.745414	0.429165	0.400699	0.434239	0.471284	0.37581	0.521302	0.433797	0.478349
0.705358	0.428276	0.435596	0.45622	0.483457	0.439086	0.599457	0.460166	0.524162
0.589254	0.557703	0.578761	0.500028	0.423964	0.406258	0.525858	0.557228	0.485629
0.665597	0.411559	0.460143	0.398902	0.39697	0.454884	0.49932	0.352087	0.401207
0.872502	0.38224	0.407313	0.345519	0.297847	0.410595	0.365279	0.335877	0.378617
0.725303	0.41743	0.451997	0.415112	0.444608	0.446279	0.516373	0.344578	0.44013
0.592571	0.563216	0.648237	0.439824	0.484355	0.528339	0.568151	0.481899	0.488251
0.689682	0.46448	0.483265	0.37165	0.365312	0.316708	0.434318	0.358289	0.375497
0.651109	0.34872	0.332008	0.320246	0.23087	0.295493	0.4437	0.235345	0.314123
0.812805	0.482408	0.498036	0.352059	0.346388	0.387473	0.438583	0.34366	0.324178
0.905198	0.455322	0.452635	0.437075	0.451806	0.494169	0.64264	0.36039	0.547274
0.778789	0.559279	0.546414	0.462034	0.49521	0.506222	0.500014	0.606345	0.530951
0.780667	0.39505	0.495961	0.41395	0.460846	0.436039	0.415026	0.373393	0.461978
0.727621	0.565846	0.546873	0.444872	0.553345	0.478265	0.573749	0.466183	0.500077
0.9495	0.611838	0.643513	0.520795	0.437541	0.614058	0.582312	0.476615	0.582745
0.765268	0.54262	0.543608	0.429532	0.454061	0.53986	0.500635	0.477745	0.436244
0.563334	0.460232	0.42126	0.381604	0.360811	0.372381	0.482094	0.363889	0.405811
0.868551	0.521704	0.52929	0.390579	0.365636	0.470295	0.406059	0.36881	0.414617
0.57061	0.387904	0.386454	0.438284	0.390444	0.435737	0.496287	0.371747	0.445704
0.858982	0.466659	0.489706	0.437043	0.447	0.544921	0.533459	0.553592	0.48773
0.654341	0.567995	0.606716	0.327007	0.307281	0.404254	0.390353	0.308685	0.51934
0.560772	0.387311	0.349127	0.460203	0.498259	0.441217	0.539479	0.411611	0.493678
0.753486	0.533939	0.510035	0.3943	0.441078	0.557764	0.462195	0.397433	0.491626
0.727147	0.384556	0.376746	0.320296	0.350592	0.34452	0.432296	0.31894	0.385545
0.709528	0.594659	0.622335	0.421733	0.484593	0.555061	0.597366	0.453162	0.510487
0.879368	0.559241	0.602188	0.338193	0.429061	0.590475	0.427086	0.448917	0.398498
0.950061	0.572078	0.603522	0.397209	0.497756	0.555847	0.514951	0.489079	0.503279
0.856945	0.532329	0.580677	0.388671	0.442556	0.533696	0.576197	0.455918	0.475018
0.956137	0.551922	0.544415	0.438221	0.463566	0.58723	0.650208	0.525628	0.539605
0.829667	0.575256	0.618583	0.442614	0.399325	0.444577	0.552211	0.469615	0.48118
0.770883	0.625098	0.65088	0.441216	0.420101	0.626428	0.516657	0.603236	0.485155
0.80897	0.549017	0.628869	0.353771	0.357295	0.505398	0.412364	0.399687	0.519868
0.655012	0.417446	0.401971	0.453023	0.448741	0.410352	0.446929	0.417695	0.418721
0.854188	0.558572	0.62015	0.461296	0.492618	0.542819	0.644965	0.461493	0.516071
0.937788	0.533148	0.551693	0.379496	0.366156	0.439784	0.37494	0.486405	0.401901
0.53331	0.52751	0.589147	0.453328	0.464383	0.46155	0.511562	0.508945	0.506331
0.622288	0.527757	0.597281	0.420114	0.449717	0.456723	0.498601	0.461778	0.468956
0.559974	0.493849	0.47997	0.38918	0.419021	0.461661	0.611292	0.402868	0.424636
0.854333	0.531216	0.620114	0.411622	0.41456	0.527967	0.539727	0.409701	0.428314
0.812994	0.42017	0.410836	0.373306	0.456735	0.575784	0.539628	0.370288	0.397863
0.735031	0.441328	0.42677	0.405968	0.389754	0.423023	0.46423	0.397891	0.442307
0.904495	0.512784	0.571112	0.460317	0.470916	0.464072	0.607734	0.486751	0.485025
0.906413	0.523566	0.577823	0.363701	0.381695	0.492573	0.41147	0.324466	0.502654
0.645724	0.557133	0.58876	0.325077	0.361875	0.486216	0.475335	0.357715	0.450233
0.757998	0.311726	0.348434	0.390233	0.410015	0.440291	0.432278	0.363451	0.422956
0.789868	0.562931	0.580822	0.501929	0.552443	0.515339	0.483007	0.441257	0.559258
0.877821	0.690971	0.709711	0.564578	0.551221	0.585814	0.665139	0.620047	0.603436
0.809377	0.509407	0.538855	0.377529	0.441446	0.565173	0.563907	0.380974	0.531539
0.606058	0.400697	0.435612	0.345935	0.328696	0.352035	0.410529	0.3687	0.413545
0.459167	0.432055	0.453308	0.350668	0.370981	0.387272	0.389293	0.369106	0.361879
0.892414	0.54833	0.557125	0.45211	0.460478	0.475137	0.597881	0.503945	0.462813
0.676488	0.331359	0.343118	0.34581	0.412381	0.43069	0.375129	0.328894	0.378408
0.810202	0.492051	0.482154	0.40589	0.452676	0.463746	0.492139	0.452038	0.479799
0.74367	0.465048	0.498814	0.419118	0.535729	0.582914	0.553716	0.383829	0.504769
0.923481	0.490427	0.478922	0.422085	0.401621	0.437287	0.370128	0.462093	0.459052
0.825654	0.377716	0.407771	0.355289	0.34453	0.466986	0.31971	0.424829	0.33458
0.695839	0.452271	0.502379	0.430418	0.482699	0.466446	0.445334	0.457337	0.491276
0.725656	0.551519	0.591436	0.373041	0.330053	0.447986	0.4524	0.364075	0.402914
0.68072	0.414374	0.47349	0.310131	0.371147	0.370961	0.443653	0.369119	0.353953
0.572204	0.549622	0.518359	0.303644	0.291947	0.323262	0.31561	0.360313	0.317418
0.655317	0.387414	0.36033	0.287676	0.327338	0.433556	0.455162	0.331594	0.472009
0.968306	0.478334	0.555294	0.487001	0.470382	0.531083	0.572336	0.482324	0.583567
0.885448	0.482746	0.450527	0.294407	0.343355	0.414833	0.438055	0.305612	0.399785
0.798095	0.522888	0.567318	0.404821	0.416079	0.562201	0.605748	0.518825	0.468923
0.74349	0.437651	0.497052	0.344047	0.396902	0.464675	0.456406	0.41819	0.452543
0.572941	0.425358	0.426456	0.324303	0.382944	0.460484	0.4304	0.363405	0.341501
0.929535	0.648251	0.767477	0.463442	0.457589	0.5486	0.567801	0.449328	0.497114
0.636956	0.420231	0.466782	0.34554	0.373987	0.464124	0.496596	0.391395	0.437687
0.799017	0.509534	0.516833	0.393717	0.449811	0.459651	0.481274	0.413582	0.483593
0.532362	0.536973	0.556546	0.392999	0.385733	0.403815	0.510992	0.377095	0.434965
0.747041	0.465116	0.491822	0.372307	0.363888	0.402978	0.526994	0.363754	0.440714
0.962564	0.414388	0.510277	0.396757	0.450549	0.461296	0.418407	0.609025	0.451396
0.834097	0.398365	0.420222	0.358798	0.389266	0.489097	0.475751	0.392499	0.412642
0.61145	0.486646	0.450414	0.435077	0.41515	0.441557	0.396603	0.396273	0.391805
0.885672	0.518967	0.556434	0.413745	0.415881	0.502471	0.441692	0.436594	0.460136
0.644743	0.401695	0.421994	0.351091	0.366332	0.477197	0.461637	0.416236	0.382244
0.551013	0.579765	0.555027	0.432621	0.404682	0.541141	0.529731	0.473863	0.475005
0.631993	0.415102	0.385577	0.350242	0.440925	0.391729	0.407851	0.355107	0.423571
0.868762	0.594371	0.614304	0.447396	0.505768	0.564025	0.587718	0.443628	0.482122
0.781118	0.523032	0.603607	0.313909	0.367178	0.471249	0.542708	0.380044	0.46095
0.961896	0.552186	0.555952	0.358128	0.439329	0.517591	0.469534	0.529883	0.528236
0.594228	0.445543	0.497327	0.426755	0.408567	0.440161	0.453247	0.516292	0.362203
0.792397	0.480422	0.545606	0.39805	0.482609	0.552931	0.47598	0.413703	0.473624
0.981106	0.460456	0.520206	0.477693	0.444526	0.434317	0.502534	0.468722	0.460007
0.800523	0.525953	0.534779	0.393968	0.474157	0.595321	0.595864	0.447097	0.511682
0.973591	0.41294	0.469196	0.363481	0.383881	0.412127	0.410588	0.382584	0.430709
0.991027	0.567629	0.62533	0.459111	0.478625	0.605969	0.588291	0.55875	0.523569
0.684162	0.429097	0.47366	0.360042	0.376645	0.492937	0.410251	0.310228	0.408492
0.87259	0.478078	0.556015	0.443578	0.461207	0.5865	0.527878	0.462611	0.50129
0.602377	0.412251	0.475424	0.338287	0.445316	0.433098	0.44285	0.359745	0.387513
0.946848	0.522169	0.544258	0.395595	0.421871	0.522027	0.497663	0.53377	0.437913
0.608909	0.522058	0.539249	0.444299	0.420011	0.409767	0.508906	0.530175	0.43893
0.836049	0.515451	0.53353	0.475002	0.477087	0.542466	0.486287	0.437048	0.543457
0.607754	0.428629	0.431186	0.348027	0.328348	0.409835	0.409605	0.394069	0.37669
0.791115	0.71836	0.745296	0.610979	0.588812	0.652705	0.613138	0.70754	0.668941
0.835031	0.514219	0.583805	0.409812	0.459681	0.544652	0.574609	0.504774	0.476256
0.887015	0.458711	0.410026	0.322953	0.332052	0.337206	0.480447	0.434858	0.291533
0.712085	0.404071	0.511331	0.408902	0.439539	0.490069	0.547654	0.416582	0.420519
0.881738	0.372849	0.379333	0.412606	0.461235	0.527226	0.469234	0.424988	0.477143
0.836172	0.422915	0.449947	0.42345	0.428313	0.460321	0.473204	0.449502	0.418872
0.756049	0.48864	0.554884	0.436647	0.448821	0.492588	0.486886	0.483182	0.491673
0.765285	0.468623	0.501463	0.395487	0.379335	0.511216	0.426076	0.476895	0.43764
0.855101	0.433531	0.4316	0.470088	0.488051	0.498055	0.534234	0.483956	0.469119
0.781406	0.426962	0.406671	0.376309	0.417643	0.502844	0.517084	0.337828	0.394082
0.640471	0.459217	0.448087	0.32371	0.376385	0.586246	0.544747	0.317315	0.497542
0.543367	0.356743	0.434374	0.36853	0.41009	0.331564	0.388486	0.375132	0.315563
0.849025	0.440596	0.500363	0.402596	0.398689	0.386797	0.45469	0.335344	0.417954
0.519035	0.478089	0.531009	0.427336	0.469822	0.51135	0.55119	0.43562	0.431047
0.868481	0.461476	0.484464	0.405539	0.426512	0.583981	0.511838	0.515316	0.447939
0.755206	0.575064	0.568954	0.517697	0.514188	0.585753	0.58772	0.450265	0.570287
0.684526	0.414184	0.47858	0.431297	0.43327	0.564672	0.466757	0.381466	0.459128
0.670934	0.466061	0.48512	0.36514	0.265524	0.391792	0.490687	0.342432	0.339321
0.603371	0.385262	0.399605	0.414741	0.365491	0.436082	0.484328	0.446534	0.400483
0.529449	0.362907	0.516667	0.360623	0.372301	0.384124	0.373457	0.325098	0.362313
0.82603	0.523683	0.626481	0.439875	0.441554	0.557732	0.588769	0.331548	0.608942
0.762599	0.410259	0.463141	0.423277	0.466998	0.49667	0.524337	0.499024	0.49263
0.774644	0.506286	0.554671	0.431863	0.418062	0.493283	0.516707	0.4219	0.474222
0.808569	0.381375	0.390931	0.393444	0.417533	0.44735	0.510089	0.348219	0.448581
0.716555	0.465502	0.584346	0.468058	0.446642	0.473042	0.498708	0.449393	0.569007
0.687374	0.485935	0.593709	0.421997	0.408934	0.585456	0.4738	0.463256	0.495474
0.668178	0.504264	0.553798	0.416741	0.457456	0.460503	0.410576	0.374952	0.469845
0.679052	0.555231	0.568624	0.455454	0.432841	0.500779	0.544186	0.493425	0.476181
0.66803	0.398851	0.400019	0.395162	0.352735	0.456768	0.458488	0.35928	0.394701
0.862493	0.381358	0.507435	0.393733	0.409386	0.419009	0.491374	0.341848	0.406456
0.557963	0.385873	0.437983	0.377618	0.407339	0.44137	0.406355	0.373787	0.395203
0.795002	0.429766	0.506133	0.344786	0.359293	0.343626	0.303106	0.345321	0.377698
0.674697	0.52117	0.542969	0.504083	0.472452	0.492098	0.551797	0.520646	0.471726
0.939454	0.519915	0.582193	0.435093	0.456189	0.5818	0.518174	0.439031	0.490063
0.955856	0.526479	0.488017	0.456572	0.464814	0.439545	0.453198	0.632873	0.489488
0.601913	0.503409	0.497915	0.323383	0.326622	0.43371	0.494928	0.437434	0.370658
0.694697	0.380591	0.414088	0.370741	0.347129	0.426056	0.453506	0.309516	0.34741
0.795575	0.564217	0.568656	0.480754	0.509098	0.545991	0.572163	0.571933	0.515414
0.843582	0.495764	0.559157	0.485827	0.506326	0.642353	0.594978	0.467635	0.595915
0.720502	0.519902	0.547555	0.392508	0.395426	0.521104	0.409932	0.422015	0.504221
0.680631	0.426314	0.430152	0.343588	0.394138	0.494391	0.459597	0.353151	0.502152
0.85648	0.494795	0.492907	0.462964	0.494717	0.530114	0.582929	0.580531	0.562722
0.962142	0.616685	0.686278	0.395734	0.46679	0.602523	0.562942	0.446968	0.509934
0.959614	0.625581	0.736561	0.479201	0.438916	0.534723	0.654391	0.357158	0.551443
0.656028	0.51607	0.594338	0.455475	0.525899	0.503032	0.490794	0.510242	0.455816
0.803051	0.580111	0.59016	0.419669	0.441099	0.48971	0.502883	0.496011	0.497841
0.741164	0.516495	0.558463	0.436863	0.466243	0.586226	0.573967	0.494082	0.548887
0.746163	0.686088	0.694529	0.543533	0.5489	0.516458	0.611061	0.567206	0.57937
0.884969	0.540752	0.576985	0.418785	0.532743	0.579033	0.589723	0.482403	0.543482
0.778607	0.336416	0.396058	0.2978	0.336268	0.600736	0.40432	0.301261	0.401014
0.742212	0.456918	0.445914	0.39785	0.403434	0.458221	0.583594	0.415668	0.470991
0.839889	0.6183	0.638493	0.479079	0.417711	0.476968	0.495525	0.40182	0.451372
0.597629	0.332516	0.321937	0.344289	0.365072	0.37062	0.379001	0.44539	0.401608
0.845601	0.568466	0.562969	0.454556	0.471118	0.498925	0.540966	0.510622	0.510174
0.974205	0.554119	0.617292	0.498684	0.479132	0.585796	0.619407	0.675441	0.527756
0.666797	0.444342	0.461246	0.380371	0.413347	0.416722	0.460074	0.360636	0.383493
0.602019	0.443551	0.445818	0.348884	0.351614	0.432944	0.427134	0.463973	0.384073
0.604962	0.429991	0.466117	0.360908	0.370234	0.447186	0.452409	0.311738	0.38181
0.605075	0.410807	0.432878	0.392436	0.455891	0.40262	0.501155	0.415186	0.424597
0.767621	0.451485	0.420998	0.414718	0.413342	0.431386	0.448391	0.438234	0.398649
0.842496	0.509432	0.516149	0.343968	0.44225	0.62986	0.450853	0.392764	0.547102
0.900369	0.419795	0.452994	0.365141	0.385451	0.403176	0.366617	0.448844	0.457387
0.775325	0.475439	0.487926	0.509762	0.459496	0.445759	0.575234	0.499162	0.495715
0.579473	0.363642	0.337806	0.353602	0.278701	0.300998	0.385395	0.443545	0.294472
0.790664	0.598511	0.636632	0.471856	0.470631	0.60253	0.516966	0.49664	0.51365
0.707022	0.453313	0.501287	0.359138	0.362544	0.50612	0.507322	0.375791	0.472004
0.946339	0.375701	0.433701	0.391158	0.440916	0.492269	0.433087	0.369811	0.410058
0.661835	0.459424	0.485106	0.410807	0.407421	0.57324	0.619867	0.473863	0.462319
0.808709	0.475477	0.471925	0.433856	0.476216	0.441532	0.559691	0.363924	0.479643
0.923248	0.556249	0.61985	0.35793	0.406404	0.465653	0.508531	0.375265	0.442038
0.872924	0.419216	0.458471	0.418319	0.499899	0.583642	0.589204	0.465457	0.500209
0.805092	0.52567	0.513253	0.40609	0.426749	0.432118	0.414611	0.434387	0.43895
0.922739	0.608126	0.66388	0.472304	0.501635	0.533853	0.484794	0.429032	0.53225
0.66795	0.641822	0.689747	0.356254	0.444575	0.493895	0.624526	0.406864	0.448466
0.576014	0.518758	0.5416	0.357143	0.435941	0.480182	0.422701	0.376555	0.351049
0.962616	0.567485	0.612143	0.483265	0.47693	0.605287	0.686184	0.601229	0.577945
0.861089	0.419263	0.48833	0.389808	0.388656	0.535832	0.397203	0.385865	0.381879
0.902792	0.552822	0.582069	0.440886	0.462501	0.682905	0.534857	0.430024	0.454857
0.754539	0.512789	0.595476	0.436227	0.466287	0.52899	0.526905	0.474494	0.508455
0.756247	0.476267	0.507993	0.457345	0.442149	0.471181	0.469154	0.445967	0.497328
0.793538	0.618349	0.622961	0.408285	0.409878	0.547338	0.537351	0.39016	0.431717
0.593099	0.489461	0.467127	0.404946	0.441035	0.424811	0.395986	0.457719	0.408316
0.849058	0.569832	0.64265	0.514614	0.505315	0.523777	0.537588	0.576941	0.50994
0.901826	0.625697	0.652694	0.490033	0.496335	0.59933	0.660284	0.443802	0.518368
0.795259	0.475806	0.5133	0.451034	0.391501	0.455519	0.383503	0.510265	0.45127
0.827645	0.516726	0.566817	0.451285	0.40546	0.486802	0.488886	0.399385	0.451509
0.909083	0.597182	0.597488	0.371479	0.415511	0.56151	0.565591	0.389457	0.587787
0.694723	0.562981	0.5411	0.464412	0.434934	0.612355	0.599574	0.448152	0.486881
0.763259	0.423221	0.441981	0.401486	0.421575	0.450743	0.457201	0.390137	0.436253
0.588318	0.469617	0.487913	0.308352	0.349722	0.471978	0.497265	0.357718	0.371403
0.790483	0.549561	0.555175	0.440045	0.419947	0.526215	0.496695	0.480516	0.427737
0.83252	0.468056	0.540923	0.424863	0.44427	0.49131	0.469468	0.444823	0.431204
0.705194	0.293873	0.340059	0.349242	0.357701	0.363488	0.321617	0.429151	0.405465
0.849326	0.434924	0.442602	0.34433	0.312869	0.298972	0.437392	0.390187	0.278886
0.937928	0.388929	0.436374	0.35345	0.31741	0.500273	0.457513	0.292858	0.371324
0.656559	0.350838	0.362437	0.36482	0.347385	0.431864	0.33804	0.31748	0.376639
0.893837	0.524733	0.536794	0.456697	0.451439	0.524763	0.437683	0.416436	0.44412
0.867533	0.475425	0.489788	0.495693	0.489648	0.460108	0.571818	0.535058	0.457578
0.645654	0.616606	0.596635	0.486764	0.485027	0.543067	0.543214	0.504004	0.506034
0.84404	0.398461	0.435031	0.376809	0.377273	0.475374	0.563193	0.396815	0.431227
0.565979	0.479923	0.480635	0.400845	0.368893	0.44616	0.499128	0.384766	0.371655
0.736575	0.332033	0.339518	0.329704	0.301525	0.42546	0.390108	0.329991	0.325161
0.910079	0.606885	0.647406	0.423133	0.426597	0.55377	0.517689	0.506254	0.447349
0.861106	0.437261	0.474322	0.41432	0.41353	0.450663	0.454542	0.46188	0.460498
0.850729	0.439481	0.47688	0.406215	0.410746	0.462469	0.51722	0.399512	0.46447
0.816365	0.368469	0.388009	0.419281	0.411123	0.487495	0.366754	0.592603	0.41573
0.559682	0.390706	0.407033	0.379369	0.344551	0.364334	0.38525	0.388658	0.354423
0.858209	0.479945	0.514367	0.431566	0.444521	0.510074	0.490049	0.414743	0.431716
0.761128	0.448686	0.485155	0.346468	0.380192	0.594581	0.438932	0.464375	0.426964
0.855821	0.52801	0.516377	0.397462	0.399133	0.438759	0.558231	0.381433	0.443274
0.798307	0.535949	0.538494	0.517126	0.610582	0.679544	0.550695	0.462301	0.591688
0.775296	0.572751	0.59688	0.503073	0.427998	0.535723	0.659077	0.588838	0.491985
0.964021	0.496394	0.528615	0.53024	0.476834	0.559245	0.526344	0.481472	0.561465
0.893433	0.541134	0.505196	0.452187	0.457508	0.480881	0.432171	0.451878	0.470531
0.659929	0.388325	0.430132	0.334745	0.339239	0.388277	0.268527	0.40499	0.365975
0.734148	0.551877	0.542533	0.409176	0.361118	0.454312	0.410581	0.410673	0.42695
0.671669	0.522542	0.556874	0.404925	0.43053	0.370252	0.479646	0.400979	0.381634
0.790922	0.474543	0.475169	0.400252	0.385732	0.398518	0.465507	0.449296	0.335332
0.918806	0.675429	0.694816	0.581712	0.609582	0.597159	0.639898	0.617673	0.638941
0.908306	0.662695	0.653398	0.55705	0.55655	0.59448	0.6733	0.581532	0.572309
0.570214	0.462291	0.436282	0.353933	0.331984	0.626605	0.559794	0.337955	0.5111
0.69561	0.573352	0.640488	0.425616	0.497187	0.610201	0.583616	0.492188	0.496977
0.802163	0.331993	0.390867	0.400716	0.330274	0.485874	0.376104	0.363881	0.346864
0.811203	0.514943	0.522392	0.448554	0.391396	0.451611	0.486797	0.46888	0.451576
0.680468	0.45452	0.454265	0.414966	0.462411	0.517439	0.436576	0.435894	0.48237
0.801984	0.494925	0.574145	0.389229	0.490833	0.529692	0.440699	0.517113	0.544857
0.602992	0.596141	0.583041	0.400523	0.410092	0.465511	0.51972	0.431686	0.503062
0.835575	0.539237	0.555528	0.541796	0.445968	0.589893	0.532097	0.553173	0.530767
0.895821	0.402083	0.425594	0.434476	0.496215	0.537692	0.540802	0.346309	0.458819
0.769687	0.419369	0.482396	0.355573	0.41616	0.38076	0.406047	0.31534	0.36786
0.51728	0.36401	0.381065	0.342343	0.406475	0.433384	0.435869	0.379243	0.395998
0.79691	0.439976	0.437402	0.342765	0.419826	0.461623	0.449122	0.476685	0.536763
0.816944	0.618908	0.664679	0.370443	0.404312	0.543509	0.519669	0.415979	0.512947
0.887919	0.412292	0.414112	0.400949	0.413351	0.432143	0.44747	0.416205	0.406655
0.607381	0.477754	0.494731	0.424457	0.385853	0.40424	0.462991	0.483791	0.42422
0.636756	0.455206	0.539319	0.446378	0.459531	0.52401	0.517458	0.412242	0.470933
0.602511	0.491412	0.522814	0.336106	0.362773	0.388384	0.426825	0.331139	0.419342
0.683336	0.472078	0.478621	0.463681	0.470984	0.515416	0.572566	0.431383	0.459539
0.922212	0.590268	0.592228	0.439795	0.420602	0.455758	0.468358	0.449459	0.442654
0.620015	0.544061	0.565872	0.454988	0.460335	0.466485	0.509851	0.511004	0.473247
0.796002	0.4917	0.488574	0.432774	0.499484	0.565545	0.57505	0.44139	0.47674
0.975838	0.601283	0.634927	0.436928	0.487503	0.625108	0.626778	0.481744	0.582668
0.810869	0.443852	0.480579	0.462391	0.455828	0.506579	0.569125	0.494747	0.441199
0.987252	0.459338	0.436671	0.355988	0.399395	0.426597	0.485874	0.378656	0.419986
0.837261	0.534203	0.640263	0.381324	0.452403	0.532412	0.578881	0.366195	0.465145
0.968428	0.4465	0.484988	0.396945	0.400396	0.400515	0.460328	0.4745	0.393292
0.917384	0.500768	0.468642	0.423419	0.459802	0.534211	0.515499	0.51234	0.4563
0.955417	0.383348	0.400685	0.421153	0.454042	0.492535	0.534512	0.510029	0.475568
0.966216	0.525847	0.627555	0.358109	0.412521	0.463393	0.540084	0.375437	0.435365
0.556435	0.342357	0.314592	0.346499	0.351777	0.347142	0.31519	0.337529	0.36136
0.461745	0.320734	0.342471	0.344086	0.317561	0.397347	0.382706	0.501559	0.347684
0.910676	0.455956	0.497797	0.386933	0.415869	0.434987	0.541992	0.401959	0.393771
0.690307	0.337799	0.33414	0.317297	0.433662	0.431108	0.402734	0.335902	0.35964
0.83698	0.483932	0.500713	0.426494	0.477203	0.527056	0.511267	0.461799	0.520929
0.820987	0.519145	0.575918	0.49003	0.494043	0.542774	0.599953	0.462751	0.59456
0.700625	0.602289	0.631819	0.396955	0.457572	0.489323	0.484516	0.42142	0.470968
0.641427	0.510161	0.470813	0.322253	0.394005	0.421946	0.42587	0.35881	0.49397
0.926514	0.768533	0.783502	0.502748	0.458576	0.554025	0.686127	0.434554	0.681223
0.760202	0.536716	0.488773	0.401087	0.39156	0.403288	0.544739	0.42812	0.408189
0.8942	0.382541	0.472351	0.340432	0.380984	0.407435	0.458354	0.277955	0.339464
0.530482	0.471879	0.498604	0.405891	0.475478	0.45995	0.463717	0.413901	0.404783
0.969851	0.675246	0.763906	0.52003	0.514083	0.522169	0.614211	0.534052	0.572555
0.927937	0.482574	0.503715	0.412958	0.377652	0.51339	0.511039	0.423193	0.428073
0.713891	0.49053	0.533007	0.380386	0.456985	0.465698	0.498103	0.357681	0.48901
0.843266	0.507245	0.58895	0.304613	0.380365	0.578285	0.455121	0.477183	0.354222
0.73554	0.496838	0.477647	0.355537	0.420526	0.527547	0.486152	0.450417	0.371739
0.684952	0.455057	0.531171	0.361045	0.354713	0.433825	0.425223	0.358794	0.393224
0.763951	0.608884	0.632245	0.552157	0.530355	0.523994	0.630951	0.596094	0.513862
0.768428	0.524341	0.560376	0.381574	0.389795	0.437168	0.478563	0.441206	0.501963
0.672014	0.541808	0.54215	0.491545	0.472492	0.455536	0.483693	0.542116	0.465178
0.821914	0.498212	0.511925	0.371092	0.395749	0.46918	0.564483	0.431021	0.417946
0.865338	0.501165	0.56239	0.391803	0.481256	0.500039	0.459035	0.39588	0.475077
0.644934	0.514629	0.561147	0.40648	0.393625	0.474506	0.489399	0.492999	0.419165
0.926339	0.521847	0.606638	0.461116	0.406246	0.48067	0.512818	0.377678	0.520723
0.732648	0.53375	0.564201	0.432014	0.497089	0.48509	0.493339	0.487835	0.578409
0.7781	0.459773	0.510512	0.4122	0.441427	0.560715	0.671463	0.461742	0.461522
0.72784	0.402553	0.523719	0.372183	0.445615	0.545233	0.526438	0.394932	0.54534
0.789535	0.576814	0.568126	0.471285	0.422152	0.472354	0.613102	0.437891	0.471746
0.842827	0.460869	0.505106	0.353904	0.393329	0.471014	0.491303	0.425551	0.444778
0.715909	0.478872	0.507105	0.430679	0.479167	0.521085	0.581924	0.511521	0.526998
0.982423	0.515708	0.590406	0.418822	0.442609	0.560307	0.541253	0.42422	0.469129
0.723039	0.583222	0.616684	0.442341	0.470874	0.444615	0.48113	0.466496	0.478486
0.90137	0.551679	0.541307	0.397469	0.448264	0.560711	0.648282	0.433014	0.496739
0.655136	0.489181	0.471428	0.334553	0.354607	0.347513	0.495674	0.331878	0.35747
0.787413	0.564697	0.675081	0.494301	0.502586	0.559564	0.569113	0.548986	0.539825
0.983494	0.620344	0.685566	0.50675	0.548732	0.584365	0.607628	0.401697	0.575599
0.963196	0.402038	0.538933	0.351025	0.331874	0.427332	0.405731	0.357397	0.333081
0.525691	0.4998	0.512933	0.455622	0.441607	0.436631	0.487071	0.389749	0.440389
0.701489	0.392105	0.403012	0.42381	0.416081	0.506245	0.457966	0.335312	0.476145
0.847375	0.453452	0.516265	0.365969	0.300518	0.453469	0.461723	0.543492	0.399954
0.591045	0.499744	0.493627	0.44066	0.465981	0.54143	0.579795	0.490465	0.472931
0.905566	0.452764	0.453277	0.427718	0.404748	0.427798	0.487716	0.401717	0.412228
0.617875	0.461694	0.467794	0.347245	0.343594	0.47236	0.418483	0.308327	0.423581
0.797095	0.497538	0.477569	0.470048	0.428278	0.459281	0.590407	0.425192	0.486361
0.914504	0.372452	0.412763	0.399416	0.384702	0.43663	0.43191	0.43952	0.446517
0.783447	0.605589	0.638421	0.405776	0.390244	0.559674	0.563884	0.485559	0.522141
0.807239	0.424114	0.393361	0.356996	0.263604	0.431164	0.439094	0.308611	0.414437
0.806076	0.540486	0.541824	0.533411	0.466571	0.427658	0.565922	0.55072	0.521728
0.620212	0.428378	0.486731	0.337901	0.33474	0.40684	0.470051	0.351394	0.342165
0.610623	0.478943	0.499314	0.403163	0.481511	0.525385	0.540564	0.427258	0.461566
0.937746	0.548549	0.63948	0.516843	0.481027	0.568886	0.611222	0.540262	0.5925
0.729517	0.443843	0.408615	0.403176	0.390506	0.443113	0.503737	0.505678	0.423282
0.731076	0.439019	0.498931	0.335343	0.284802	0.384711	0.483529	0.310481	0.364781
0.770192	0.593979	0.641687	0.457231	0.509181	0.508087	0.522716	0.47742	0.559143
0.661108	0.518855	0.557783	0.4881	0.509492	0.591389	0.611972	0.493367	0.520608
0.711185	0.472084	0.53083	0.362906	0.423271	0.467274	0.537733	0.399964	0.421119
0.792999	0.423624	0.440257	0.47019	0.402965	0.475488	0.444485	0.436047	0.480675
0.840896	0.412231	0.456261	0.434409	0.423059	0.468866	0.420211	0.38086	0.441435
0.772009	0.377706	0.418358	0.349793	0.373	0.425235	0.43602	0.390531	0.361499
0.650193	0.364017	0.420022	0.350819	0.412889	0.503747	0.486472	0.332789	0.4622
0.591439	0.613692	0.637109	0.453958	0.463343	0.545855	0.511146	0.522195	0.526936
0.536032	0.43046	0.477446	0.428654	0.43132	0.515901	0.465924	0.445864	0.44169
0.898344	0.386426	0.410058	0.374536	0.410747	0.44846	0.50616	0.395087	0.427408
0.958385	0.560526	0.593051	0.430071	0.49829	0.541801	0.537903	0.529142	0.528312
0.773936	0.458795	0.46648	0.34073	0.424353	0.443229	0.507858	0.384056	0.537353
0.680617	0.564347	0.585705	0.478001	0.451331	0.47966	0.453164	0.59246	0.475032
0.61124	0.353498	0.368572	0.325297	0.307333	0.370699	0.409894	0.324057	0.337388
0.861233	0.414786	0.383454	0.359758	0.411494	0.436405	0.506006	0.428032	0.400806
0.760843	0.431932	0.432528	0.448427	0.398471	0.422142	0.467835	0.399714	0.407695
0.894118	0.550595	0.567548	0.465781	0.39568	0.455134	0.502637	0.54283	0.398299
0.917946	0.747875	0.752658	0.53749	0.552104	0.634527	0.703463	0.682709	0.583329
0.806425	0.472601	0.489259	0.437894	0.472566	0.579854	0.473876	0.438249	0.470923
0.956172	0.509249	0.473401	0.451471	0.455442	0.534051	0.601042	0.473743	0.543044
0.586756	0.573792	0.568692	0.449745	0.426063	0.591823	0.524489	0.559379	0.479259
0.682072	0.409925	0.396412	0.377356	0.380107	0.396313	0.436299	0.303278	0.370879
0.759807	0.654131	0.652736	0.381993	0.418919	0.620396	0.568395	0.549826	0.519452
0.81784	0.577432	0.589768	0.491737	0.460819	0.536553	0.572554	0.534692	0.568252
0.819273	0.378823	0.383919	0.364957	0.380837	0.442315	0.490855	0.410036	0.358605
0.798596	0.456413	0.452746	0.336768	0.428321	0.462002	0.46398	0.352209	0.432907
0.754978	0.612755	0.616051	0.418996	0.408581	0.608407	0.634131	0.539388	0.561055
0.69547	0.392536	0.379214	0.378826	0.414514	0.364313	0.395725	0.360716	0.315584
0.793671	0.636091	0.64108	0.491234	0.471986	0.551561	0.551271	0.536305	0.587816
0.535312	0.509017	0.472438	0.381922	0.398099	0.400144	0.495068	0.37462	0.438793
0.600913	0.425781	0.48815	0.422513	0.436324	0.577254	0.441135	0.341297	0.449216
0.608342	0.418992	0.403727	0.383362	0.385495	0.502924	0.438481	0.423047	0.40551
0.932451	0.610904	0.609716	0.392756	0.449163	0.486823	0.517841	0.405011	0.496438
0.826462	0.476797	0.500857	0.42086	0.463177	0.508874	0.447114	0.46827	0.465721
0.79383	0.594076	0.653821	0.460124	0.486814	0.521969	0.610446	0.376109	0.518885
0.963547	0.523159	0.620622	0.383587	0.440317	0.461906	0.421097	0.456905	0.468549
0.619328	0.495419	0.555654	0.419779	0.441648	0.414581	0.51529	0.394981	0.479628
0.657349	0.436785	0.548319	0.342118	0.464463	0.46558	0.441079	0.38156	0.397904
0.683617	0.50799	0.579324	0.395447	0.401685	0.476965	0.396702	0.418948	0.490906
0.800965	0.556767	0.554719	0.517661	0.488384	0.468253	0.651363	0.545186	0.51326
0.93719	0.461089	0.556506	0.420621	0.446749	0.551215	0.611532	0.409093	0.533848
0.538947	0.408814	0.43406	0.387396	0.430323	0.393393	0.450744	0.337175	0.455053
0.863582	0.454935	0.430639	0.408401	0.422833	0.504473	0.534329	0.446114	0.468956
0.802963	0.354344	0.372258	0.282668	0.345678	0.376927	0.414068	0.357518	0.424215
0.868745	0.501536	0.499715	0.482222	0.471768	0.516482	0.516742	0.526088	0.537967
0.922809	0.478836	0.549947	0.51244	0.506083	0.515552	0.548585	0.599085	0.495738
0.53472	0.423411	0.44207	0.393837	0.415776	0.40062	0.465364	0.368961	0.37311
0.782441	0.633165	0.611863	0.441179	0.440633	0.506542	0.557179	0.483198	0.475081
0.774096	0.577997	0.594137	0.402909	0.371975	0.424685	0.56307	0.444725	0.471665
0.945882	0.551618	0.582726	0.483805	0.466463	0.570508	0.539407	0.424357	0.500586
0.863947	0.472067	0.555585	0.432524	0.452655	0.469185	0.522872	0.445158	0.449964
0.831607	0.418279	0.435345	0.381214	0.36215	0.37861	0.399473	0.510567	0.368694
0.844846	0.399668	0.434627	0.373728	0.384726	0.451705	0.459218	0.384472	0.396519
0.833494	0.514273	0.487652	0.336799	0.378747	0.389018	0.489473	0.321172	0.514595
0.858227	0.553348	0.568549	0.42134	0.405111	0.504847	0.495611	0.464251	0.485
0.553099	0.471991	0.465983	0.378258	0.4637	0.434603	0.382987	0.324485	0.458991
0.892116	0.489973	0.541043	0.404871	0.358548	0.33932	0.447285	0.374552	0.392341
0.832625	0.498116	0.558184	0.444534	0.429386	0.516496	0.501514	0.469054	0.457519
0.796155	0.495171	0.542906	0.38697	0.391666	0.485148	0.561027	0.376541	0.450571
0.892274	0.447141	0.48237	0.394332	0.425757	0.434747	0.451783	0.388965	0.396181
0.58133	0.445867	0.476124	0.375036	0.404715	0.421077	0.505967	0.430871	0.425642
0.57863	0.441725	0.496733	0.412278	0.424992	0.461196	0.461616	0.336522	0.454002
0.894802	0.50608	0.551636	0.418698	0.369791	0.524137	0.553798	0.565995	0.481986
0.665065	0.366024	0.396015	0.346263	0.452804	0.461537	0.508968	0.366348	0.439026
0.775331	0.46119	0.452264	0.374564	0.380712	0.432215	0.471497	0.433428	0.438469
0.65826	0.464561	0.525859	0.408018	0.413774	0.384541	0.38574	0.392537	0.409402
0.769342	0.434989	0.44629	0.371198	0.386323	0.423619	0.486907	0.418091	0.428624
0.842792	0.517626	0.530335	0.500936	0.474843	0.469099	0.438469	0.492442	0.527539
0.801194	0.467839	0.467966	0.375654	0.431697	0.536093	0.529658	0.534063	0.471932
0.793179	0.451594	0.437167	0.446672	0.472011	0.52865	0.566128	0.46019	0.490717
0.883143	0.612494	0.702927	0.503456	0.405806	0.496807	0.646971	0.480255	0.595058
0.892713	0.339119	0.34341	0.374023	0.415389	0.39885	0.47815	0.34569	0.439532
0.701967	0.598648	0.624228	0.466296	0.410629	0.5223	0.499294	0.413646	0.471185
0.83418	0.455313	0.482364	0.427033	0.423597	0.460303	0.528737	0.402013	0.507693
0.781686	0.47069	0.496329	0.418034	0.453253	0.445338	0.493291	0.483949	0.490079
0.713644	0.575962	0.57567	0.401339	0.411789	0.486882	0.539947	0.443254	0.426737
0.670484	0.559671	0.654824	0.370958	0.34924	0.543623	0.521729	0.49722	0.503664
0.841914	0.428273	0.510167	0.352656	0.428084	0.466894	0.453694	0.332222	0.426099
0.690026	0.470856	0.442462	0.377971	0.377596	0.480041	0.488249	0.381115	0.409187
0.801369	0.341317	0.372147	0.410467	0.391604	0.351502	0.410378	0.357866	0.389825
0.718853	0.562736	0.541522	0.37598	0.37167	0.412602	0.500236	0.453196	0.429429
0.724952	0.447738	0.471392	0.40594	0.451677	0.448139	0.508258	0.556988	0.473114
0.69108	0.476204	0.473669	0.384918	0.41093	0.451991	0.537067	0.33951	0.419739
0.752966	0.47133	0.425177	0.487074	0.353149	0.420318	0.450928	0.366596	0.385709
0.802739	0.44413	0.511211	0.380594	0.430967	0.433849	0.504891	0.409893	0.387084
0.929816	0.524033	0.548441	0.390382	0.535876	0.556217	0.611744	0.541451	0.47413
0.753854	0.435336	0.470571	0.406558	0.418015	0.431053	0.551675	0.438203	0.428253
0.861282	0.479492	0.488049	0.449351	0.435271	0.442576	0.512878	0.412031	0.489372
0.744987	0.42528	0.510728	0.41475	0.458244	0.565957	0.42687	0.390512	0.474726
0.85254	0.373782	0.349317	0.374643	0.384961	0.474225	0.409913	0.404158	0.356719
0.827761	0.442448	0.515093	0.412478	0.413443	0.462718	0.454897	0.359651	0.406886
0.898982	0.497509	0.530196	0.380082	0.428047	0.458749	0.564287	0.352053	0.476355
0.650452	0.380378	0.400023	0.381766	0.383799	0.394532	0.464773	0.421628	0.417634
0.906163	0.445189	0.441901	0.418502	0.439256	0.531994	0.514007	0.385712	0.49233
0.967884	0.652572	0.642937	0.514483	0.522337	0.61995	0.575815	0.50471	0.564663
0.910817	0.528254	0.532724	0.426283	0.463156	0.547341	0.497836	0.52771	0.506032
0.652239	0.426238	0.449538	0.403611	0.410254	0.450255	0.505377	0.448674	0.452962
0.701545	0.462544	0.51658	0.479382	0.454265	0.550362	0.521209	0.512761	0.473207
0.88655	0.59617	0.617677	0.485007	0.45854	0.505547	0.60951	0.467967	0.504649
0.765959	0.463517	0.477086	0.357304	0.411692	0.364081	0.46434	0.338671	0.383291
0.75784	0.471803	0.58113	0.348626	0.372296	0.516293	0.485116	0.339285	0.389724
0.805769	0.39261	0.361457	0.329636	0.338072	0.356909	0.36723	0.333494	0.37771
0.683287	0.493998	0.515953	0.472257	0.507705	0.51363	0.569311	0.491628	0.517645
0.656973	0.425767	0.477799	0.428951	0.419981	0.447177	0.403473	0.479003	0.41179
0.704214	0.536988	0.555277	0.397571	0.399469	0.459627	0.558656	0.39693	0.359527
0.908007	0.526387	0.55257	0.428161	0.463173	0.501767	0.491064	0.398527	0.504966
0.511045	0.438117	0.501871	0.42114	0.423813	0.423272	0.519346	0.498299	0.417915
0.91554	0.455311	0.439313	0.443343	0.435319	0.495298	0.526275	0.438123	0.532561
0.735768	0.407757	0.426124	0.399657	0.469768	0.481735	0.484181	0.390721	0.461819
0.623672	0.432713	0.42441	0.448263	0.417369	0.472467	0.46927	0.429567	0.410539
0.569377	0.5335	0.577411	0.425714	0.498884	0.504098	0.563815	0.460415	0.440033
0.707232	0.652263	0.655068	0.483556	0.480447	0.533897	0.516678	0.610195	0.481373
0.942054	0.719227	0.748313	0.685793	0.648802	0.676959	0.700263	0.650067	0.695773
0.5515	0.382933	0.502907	0.378506	0.404539	0.283539	0.367553	0.326656	0.361999
0.816006	0.397379	0.376725	0.409387	0.41032	0.45288	0.526582	0.484059	0.426773
0.826428	0.477761	0.488711	0.458346	0.422228	0.525257	0.533579	0.406376	0.468522
0.715119	0.368671	0.42712	0.299526	0.369918	0.462346	0.457448	0.339776	0.424009
0.83142	0.396942	0.366885	0.32438	0.381035	0.449021	0.575874	0.365223	0.385421
0.848516	0.709483	0.724483	0.533336	0.503555	0.566961	0.564283	0.479421	0.542484
0.77849	0.549372	0.543356	0.414538	0.479669	0.558991	0.555053	0.451448	0.409346
0.895189	0.454288	0.485044	0.441544	0.476712	0.525815	0.582513	0.450536	0.482076
0.612124	0.562104	0.535893	0.498223	0.492347	0.630286	0.526164	0.530634	0.509921
0.78878	0.465463	0.440759	0.427819	0.446189	0.466553	0.448381	0.506096	0.456556
0.62991	0.4245	0.405982	0.341265	0.347649	0.451586	0.46899	0.394266	0.350246
0.555911	0.554527	0.628164	0.438648	0.467574	0.511154	0.495701	0.433195	0.532671
0.8436	0.443376	0.518532	0.379683	0.45852	0.569479	0.556923	0.488219	0.429475
0.758788	0.586907	0.605418	0.379574	0.391079	0.381356	0.470641	0.369286	0.374029
0.797085	0.587914	0.594504	0.54913	0.466495	0.54084	0.528861	0.605147	0.551522
0.449605	0.41639	0.411401	0.352375	0.365899	0.414555	0.411494	0.367901	0.315319
0.721301	0.512004	0.483165	0.313853	0.393316	0.388074	0.475185	0.463904	0.42646
0.661696	0.392312	0.39977	0.439897	0.384636	0.469706	0.426648	0.50509	0.406661
0.562378	0.507826	0.568316	0.463309	0.414958	0.464969	0.49459	0.443202	0.378176
0.914241	0.574196	0.600674	0.41873	0.411342	0.43334	0.450175	0.381708	0.41068
0.956704	0.486927	0.506456	0.424092	0.404773	0.518749	0.445871	0.42002	0.487913
0.835452	0.526595	0.608723	0.43284	0.39387	0.387019	0.484177	0.417782	0.378236
0.910255	0.409897	0.417724	0.487671	0.421458	0.477056	0.529963	0.416052	0.44221
0.726216	0.530249	0.597195	0.368952	0.36063	0.460508	0.534142	0.415523	0.454012
0.574792	0.435853	0.529876	0.352913	0.399693	0.436738	0.397641	0.389698	0.462106
0.793415	0.484401	0.495759	0.432091	0.447732	0.451782	0.537299	0.451764	0.462084
0.927006	0.556532	0.567347	0.429428	0.441726	0.576395	0.685069	0.45793	0.484667
0.873398	0.382353	0.443839	0.318809	0.343876	0.45389	0.402177	0.338845	0.430372
0.798845	0.47787	0.547263	0.390983	0.382191	0.507294	0.492536	0.376478	0.463816
0.840632	0.530827	0.549171	0.428053	0.427841	0.453843	0.584751	0.431163	0.493713
0.600126	0.466908	0.456601	0.412791	0.458901	0.483416	0.478932	0.448877	0.39961
0.859931	0.622028	0.715481	0.40707	0.473657	0.633113	0.526593	0.375543	0.455415
0.884037	0.396299	0.385145	0.385732	0.397263	0.454703	0.482642	0.41892	0.431586
0.743723	0.332122	0.28566	0.326185	0.302187	0.350977	0.371637	0.35894	0.325255
0.773415	0.461075	0.430814	0.356593	0.351608	0.398353	0.468085	0.424293	0.40715
0.806111	0.538117	0.593694	0.380866	0.445512	0.557477	0.622525	0.405834	0.523218
0.634188	0.373953	0.419284	0.38904	0.387616	0.507381	0.53139	0.393158	0.410042
0.785217	0.450091	0.496518	0.406509	0.426672	0.486481	0.518857	0.408024	0.429804
0.825549	0.460804	0.46384	0.355983	0.427691	0.482564	0.51267	0.407219	0.433695
0.613121	0.516547	0.55159	0.522258	0.47264	0.495836	0.458284	0.604452	0.487078
0.853406	0.485741	0.519057	0.405547	0.433789	0.465348	0.57861	0.405112	0.474431
0.917103	0.614445	0.695547	0.431919	0.525371	0.693449	0.595467	0.467721	0.615222
0.59417	0.325898	0.381876	0.365522	0.407957	0.456663	0.375911	0.399605	0.369199
0.644426	0.458491	0.408807	0.355636	0.445349	0.472072	0.415156	0.351155	0.436466
0.735919	0.584411	0.630534	0.455312	0.492505	0.466976	0.474607	0.533562	0.484897
0.637682	0.442462	0.399618	0.371497	0.363624	0.444401	0.541081	0.424337	0.358026
0.529166	0.473027	0.452831	0.297097	0.39835	0.468237	0.494383	0.342629	0.459364
0.687995	0.406353	0.423647	0.390591	0.448751	0.486054	0.532129	0.421189	0.441771
0.91863	0.615316	0.594708	0.363328	0.397562	0.501659	0.592461	0.481527	0.394519
0.842072	0.620366	0.644104	0.596138	0.599327	0.591933	0.658601	0.558701	0.573005
0.778174	0.554601	0.554548	0.394324	0.524172	0.53556	0.519675	0.429547	0.604739
0.850553	0.532675	0.523476	0.352627	0.36281	0.456621	0.589154	0.340177	0.411826
0.85345	0.496931	0.478489	0.369379	0.451599	0.428891	0.489595	0.397667	0.419618
0.85691	0.480936	0.546612	0.445528	0.537475	0.556512	0.525752	0.438567	0.516865
0.899421	0.559697	0.581735	0.438961	0.483214	0.556793	0.55201	0.463471	0.500756
0.619969	0.36212	0.421782	0.390589	0.3795	0.39291	0.435695	0.370589	0.371772
0.648237	0.436762	0.425255	0.439613	0.395879	0.455015	0.50531	0.421539	0.437448
0.523396	0.424986	0.518069	0.38048	0.375183	0.455346	0.545785	0.416686	0.470308
0.584881	0.490005	0.52208	0.42046	0.427972	0.494394	0.443977	0.497193	0.525433
0.609326	0.441799	0.439768	0.39852	0.425385	0.483664	0.422635	0.442856	0.452079
0.783332	0.542111	0.547472	0.395468	0.459109	0.49698	0.516818	0.426149	0.494522
0.93266	0.629249	0.680315	0.334101	0.506494	0.722682	0.562685	0.454982	0.591103
0.607888	0.41981	0.413942	0.416374	0.384688	0.482267	0.526721	0.382925	0.417882
0.473766	0.473603	0.469684	0.413598	0.391716	0.444743	0.409374	0.490125	0.393629
0.510852	0.415182	0.460979	0.28635	0.305841	0.332885	0.430978	0.37443	0.39951
0.535604	0.420094	0.392662	0.386342	0.366373	0.369072	0.407204	0.401317	0.372042
0.794443	0.522013	0.596078	0.370794	0.404468	0.455477	0.51533	0.362609	0.384599
0.712853	0.470777	0.54031	0.384166	0.376637	0.549811	0.366105	0.342977	0.44564
0.658293	0.497402	0.555808	0.386497	0.450583	0.522734	0.514216	0.49165	0.418563
0.561352	0.405273	0.413789	0.39438	0.351537	0.421063	0.422111	0.320559	0.353014
0.756313	0.730857	0.736208	0.640073	0.611564	0.552129	0.700635	0.65447	0.675841
0.841457	0.646547	0.716251	0.514429	0.490667	0.53994	0.629861	0.440039	0.539776
0.480983	0.398818	0.382513	0.371996	0.374852	0.334496	0.430993	0.366792	0.313383
0.757033	0.592267	0.591704	0.404432	0.447233	0.473825	0.435513	0.45734	0.431304
0.702209	0.408184	0.461028	0.336711	0.365794	0.375141	0.407121	0.377517	0.340643
0.640623	0.437502	0.46399	0.44149	0.432877	0.511075	0.471027	0.469863	0.470314
0.479015	0.492595	0.508809	0.39654	0.380619	0.439326	0.536669	0.404798	0.408049
0.811826	0.583205	0.588507	0.410842	0.411548	0.514119	0.582398	0.286575	0.595264
0.807882	0.593205	0.611937	0.420669	0.434688	0.554806	0.52773	0.387086	0.443143
0.862774	0.41783	0.452114	0.387334	0.410847	0.471695	0.460074	0.366611	0.433343
0.477507	0.326523	0.320242	0.40432	0.341062	0.451821	0.425183	0.403499	0.359145
0.834486	0.514482	0.528819	0.444019	0.440349	0.47023	0.455838	0.386216	0.488498
0.573403	0.416191	0.445539	0.392103	0.406853	0.381416	0.462633	0.428189	0.393122
0.670199	0.472234	0.482237	0.470524	0.466679	0.463508	0.479106	0.393471	0.443678
0.882599	0.467224	0.442145	0.374168	0.349629	0.398092	0.337282	0.376155	0.338396
0.8564	0.423329	0.408509	0.298252	0.341466	0.477446	0.392278	0.37507	0.374987
0.858982	0.391868	0.413625	0.370066	0.38007	0.456226	0.429901	0.397603	0.385448
0.697826	0.391219	0.379439	0.414482	0.365196	0.391376	0.4119	0.361125	0.368437
0.709601	0.581196	0.581292	0.453351	0.442292	0.535349	0.621532	0.519135	0.450218
0.745825	0.403233	0.467574	0.40467	0.395192	0.447168	0.456328	0.4112	0.466397
0.50713	0.414644	0.45844	0.435692	0.430862	0.425211	0.468456	0.39825	0.499962
0.810237	0.426113	0.437142	0.35095	0.35244	0.431376	0.443442	0.456615	0.445091
0.668751	0.43931	0.437781	0.422567	0.388604	0.376581	0.444577	0.337933	0.348054
0.948464	0.623939	0.63356	0.481482	0.38861	0.527748	0.526877	0.554016	0.534875
0.680263	0.461144	0.449408	0.45148	0.501448	0.378828	0.472022	0.519167	0.514303
0.70878	0.534248	0.560311	0.400529	0.447305	0.455432	0.477124	0.500738	0.487459
0.968499	0.595484	0.595848	0.450405	0.510021	0.604729	0.599189	0.441688	0.486165
0.772542	0.462962	0.517649	0.424359	0.43548	0.590493	0.57848	0.455528	0.466269
0.67921	0.453981	0.454985	0.353101	0.407784	0.434062	0.418583	0.430621	0.470693
0.766486	0.443182	0.479435	0.406251	0.3898	0.42238	0.499359	0.468561	0.500804
0.849322	0.427216	0.448271	0.453567	0.394916	0.595096	0.509638	0.460571	0.45394
0.740211	0.379739	0.406054	0.380204	0.351608	0.428422	0.339501	0.404898	0.367358
0.732546	0.682774	0.667954	0.437854	0.453315	0.547712	0.523703	0.427829	0.489081
0.911888	0.517536	0.537535	0.40715	0.376961	0.523089	0.48795	0.543666	0.500979
0.87489	0.419715	0.500147	0.383037	0.398247	0.473482	0.484075	0.394286	0.433573
0.896534	0.485255	0.480168	0.389047	0.409442	0.446531	0.411656	0.377006	0.451301
0.953977	0.625366	0.684649	0.518947	0.529543	0.586738	0.602081	0.451402	0.617439
0.857384	0.553029	0.540552	0.445629	0.438401	0.514111	0.505777	0.428387	0.4575
0.744917	0.416891	0.403263	0.406287	0.352429	0.361889	0.491338	0.470094	0.363989
0.823213	0.514962	0.571541	0.481374	0.419968	0.537096	0.490246	0.487497	0.468275
0.604075	0.456233	0.449997	0.342901	0.372653	0.4179	0.428631	0.382985	0.349745
0.906497	0.634914	0.670831	0.513737	0.494608	0.58555	0.591877	0.647783	0.548552
0.682318	0.453775	0.441152	0.390636	0.345025	0.422898	0.471045	0.335676	0.316495
0.790729	0.535759	0.529193	0.382096	0.4112	0.510587	0.516577	0.435969	0.386051
0.763178	0.463236	0.50799	0.418397	0.439906	0.511297	0.495023	0.457878	0.423893
0.766479	0.458421	0.473194	0.417769	0.419642	0.467027	0.470865	0.424064	0.441896
0.581159	0.346707	0.361568	0.296649	0.37857	0.395864	0.457072	0.279258	0.35445
0.745935	0.548675	0.543606	0.464333	0.433332	0.487228	0.547842	0.442817	0.496304
0.663459	0.481774	0.488179	0.415485	0.438429	0.395547	0.466744	0.478713	0.425348
0.538951	0.447935	0.482031	0.330695	0.388028	0.471864	0.451952	0.340212	0.399104
0.598191	0.578477	0.597441	0.493938	0.556767	0.511991	0.547102	0.519838	0.535951
0.793731	0.437447	0.410216	0.411826	0.472565	0.421198	0.476644	0.415788	0.472531
0.797972	0.576752	0.594967	0.394641	0.368234	0.552855	0.553413	0.39537	0.42778
0.660369	0.402154	0.45075	0.427037	0.498543	0.543017	0.491963	0.526476	0.428131
0.628602	0.484463	0.514561	0.375577	0.377422	0.494755	0.411409	0.405942	0.477734
0.876435	0.462932	0.464695	0.358879	0.391794	0.45136	0.568688	0.522314	0.457854
0.701124	0.400283	0.409832	0.425953	0.402132	0.477763	0.520541	0.417628	0.464781
0.598507	0.430587	0.438093	0.406276	0.412904	0.438868	0.455731	0.511084	0.440869
0.779801	0.435554	0.517925	0.431693	0.412608	0.553523	0.425341	0.540372	0.445807
0.624127	0.392371	0.376723	0.261245	0.331124	0.323739	0.436271	0.234335	0.345804
0.701879	0.381855	0.410572	0.336107	0.374465	0.480195	0.447107	0.347087	0.391502
0.783017	0.546185	0.575223	0.44303	0.49302	0.493565	0.589857	0.472301	0.508287
0.895417	0.470128	0.533209	0.428249	0.384836	0.51826	0.502854	0.466601	0.523256
0.620837	0.448349	0.432671	0.384206	0.383084	0.456434	0.426106	0.398649	0.377543
0.611501	0.493425	0.535665	0.413024	0.437326	0.548452	0.476006	0.417918	0.495911
0.922371	0.513353	0.509235	0.491983	0.454303	0.449721	0.632289	0.600188	0.474301
0.972572	0.509169	0.515003	0.330255	0.344766	0.368331	0.395631	0.387787	0.350371
0.655294	0.412257	0.426841	0.530489	0.389683	0.383044	0.392827	0.492436	0.3911
0.529282	0.385735	0.394271	0.34285	0.376453	0.403398	0.404005	0.364324	0.372585
0.536664	0.437793	0.499969	0.392984	0.441361	0.484398	0.488268	0.417073	0.471161
0.87403	0.550306	0.655493	0.423293	0.506434	0.440393	0.494824	0.407899	0.552664
0.96532	0.551253	0.587964	0.42138	0.371024	0.520318	0.467553	0.507264	0.42291
0.841036	0.542309	0.597802	0.408626	0.49849	0.555934	0.555869	0.435953	0.502299
0.610939	0.461142	0.438292	0.39662	0.416043	0.421375	0.469112	0.433014	0.434383
0.540362	0.478794	0.435936	0.400268	0.421973	0.539409	0.508068	0.366096	0.409923
0.822339	0.491968	0.574929	0.429926	0.406088	0.424331	0.442707	0.456496	0.405365
0.955329	0.425578	0.460673	0.455623	0.424727	0.405622	0.491169	0.381323	0.409994
0.604543	0.442321	0.467985	0.322044	0.378698	0.4155	0.48827	0.429132	0.371722
0.69417	0.477755	0.525181	0.433166	0.446602	0.44007	0.494476	0.367349	0.45045
0.870764	0.510911	0.549546	0.380386	0.381018	0.38586	0.526973	0.402215	0.453313
0.935522	0.594415	0.708847	0.514404	0.521639	0.689452	0.520812	0.403756	0.60264
0.824355	0.531615	0.552566	0.433415	0.457775	0.494673	0.469187	0.415331	0.447748
0.738964	0.509468	0.532202	0.414914	0.462761	0.464705	0.430131	0.447249	0.501454
0.802038	0.399443	0.36375	0.328002	0.348928	0.516926	0.532551	0.497961	0.457524
0.844695	0.469154	0.473519	0.425085	0.400833	0.432291	0.609606	0.45484	0.447591
0.831975	0.462275	0.506408	0.447899	0.503023	0.566513	0.550431	0.446225	0.49402
0.892625	0.412247	0.4279	0.435896	0.477348	0.413412	0.471322	0.442878	0.41072
0.639824	0.460106	0.561972	0.422459	0.356248	0.37645	0.456031	0.563446	0.366593
0.738982	0.439494	0.447193	0.409919	0.465028	0.392894	0.43413	0.356234	0.432185
0.832291	0.476301	0.539089	0.432307	0.45234	0.476647	0.522675	0.422433	0.45632
0.584494	0.380446	0.371158	0.373823	0.388034	0.499903	0.38926	0.397406	0.399242
0.785477	0.517807	0.510987	0.458231	0.470832	0.485128	0.594479	0.509667	0.441923
0.795452	0.430664	0.420054	0.370388	0.3349	0.406684	0.434723	0.37868	0.415802
0.704736	0.322878	0.349312	0.34101	0.365595	0.40611	0.379164	0.382878	0.315068
0.899298	0.518598	0.522754	0.456839	0.437553	0.524944	0.474289	0.544287	0.463645
0.946936	0.720305	0.755801	0.634815	0.582516	0.643152	0.670903	0.703703	0.652296
0.694769	0.490973	0.478542	0.424821	0.348576	0.41855	0.472323	0.454842	0.419521
0.61815	0.343036	0.325478	0.323376	0.355712	0.479922	0.470823	0.364265	0.366801
0.541879	0.452432	0.445937	0.414837	0.402166	0.42215	0.483822	0.375474	0.422063
0.769315	0.463396	0.453847	0.385495	0.475507	0.63801	0.537656	0.438023	0.48774
0.800423	0.486608	0.565113	0.290251	0.435156	0.60409	0.523548	0.377118	0.493012
0.937226	0.643931	0.662712	0.466574	0.465774	0.593037	0.664477	0.54551	0.602783
0.77561	0.729231	0.732223	0.470358	0.472972	0.615404	0.536844	0.531218	0.486285
0.824994	0.502318	0.547234	0.324842	0.373799	0.3957	0.384862	0.312558	0.37459
0.59029	0.51783	0.469983	0.436735	0.453502	0.440799	0.551998	0.417224	0.460883
0.680896	0.514796	0.545446	0.348963	0.291496	0.36989	0.357587	0.434124	0.378842
0.955751	0.506919	0.591748	0.351833	0.43013	0.558355	0.593331	0.336721	0.489446
0.750463	0.467975	0.463794	0.395982	0.452399	0.443877	0.476293	0.344448	0.364837
0.874153	0.641369	0.628051	0.570852	0.525911	0.477126	0.624217	0.560085	0.568402
0.676624	0.548721	0.531254	0.421961	0.454729	0.486991	0.402843	0.580703	0.444276
0.952063	0.511932	0.589766	0.413779	0.454721	0.600286	0.515453	0.431123	0.507651
0.874065	0.457673	0.439382	0.366237	0.404494	0.404325	0.495001	0.458717	0.378433
0.775874	0.460944	0.514929	0.330748	0.373039	0.50858	0.479263	0.379664	0.400938
0.748306	0.502178	0.484303	0.40094	0.400816	0.365706	0.541508	0.390888	0.381695
0.852011	0.537986	0.617741	0.385686	0.426646	0.538933	0.607795	0.424825	0.461425
0.856152	0.546137	0.563119	0.474646	0.477473	0.519414	0.542717	0.503517	0.539939
0.980983	0.692418	0.777598	0.467847	0.462541	0.54511	0.608146	0.465737	0.526178
0.881996	0.495964	0.562065	0.407059	0.449395	0.523565	0.509356	0.406501	0.491216
0.763502	0.554688	0.531008	0.472838	0.429704	0.486434	0.486611	0.54155	0.481874
0.641893	0.341895	0.370482	0.310109	0.378263	0.436988	0.541369	0.319059	0.374414
0.782704	0.374607	0.364482	0.365785	0.351767	0.509966	0.478704	0.378777	0.395002
0.48576	0.511205	0.513523	0.39972	0.431054	0.495676	0.457628	0.46754	0.462687
0.877454	0.530911	0.563274	0.347242	0.424454	0.479005	0.423111	0.416118	0.467124
0.481651	0.484872	0.54412	0.402627	0.401088	0.420212	0.511059	0.403879	0.437481
0.477551	0.350303	0.333408	0.406596	0.388903	0.419542	0.37608	0.314175	0.349596
0.612716	0.454099	0.424107	0.401695	0.357089	0.448946	0.48683	0.32141	0.412453
0.799989	0.475212	0.451243	0.45728	0.414024	0.475365	0.49374	0.426515	0.409959
0.925742	0.588461	0.693237	0.438401	0.454542	0.506842	0.553361	0.484127	0.486756
0.862908	0.307184	0.307163	0.38146	0.399079	0.40879	0.346403	0.357804	0.388841
0.723007	0.516635	0.526863	0.468152	0.449845	0.484055	0.509585	0.514635	0.516222
0.682099	0.472637	0.436101	0.477034	0.527078	0.496892	0.522751	0.47917	0.503249
0.819122	0.513095	0.554623	0.427421	0.403389	0.502925	0.483948	0.520446	0.469111
0.980439	0.737551	0.752442	0.539785	0.544735	0.557662	0.689494	0.560432	0.640718
0.821366	0.486373	0.488282	0.40237	0.391902	0.438092	0.447599	0.375194	0.376468
0.728336	0.422653	0.430693	0.400814	0.443043	0.426875	0.475228	0.428012	0.419077
0.736769	0.398069	0.394635	0.383235	0.366739	0.421409	0.321223	0.408761	0.372102
0.553976	0.39135	0.41251	0.337493	0.340468	0.36562	0.301295	0.416081	0.321604
0.940386	0.752916	0.773234	0.680105	0.632531	0.670761	0.684872	0.685462	0.672739
0.802441	0.499208	0.514695	0.414362	0.428427	0.534729	0.552577	0.492867	0.476441
0.67229	0.487909	0.578913	0.437231	0.447967	0.540259	0.504055	0.411725	0.439323
0.675906	0.50205	0.553259	0.394739	0.420441	0.437997	0.540684	0.442315	0.456732
0.664162	0.445693	0.493742	0.446339	0.445013	0.441466	0.431654	0.406833	0.483016
0.732743	0.491253	0.531804	0.393885	0.372924	0.487913	0.446791	0.371926	0.452817
0.719192	0.483996	0.484787	0.44384	0.414742	0.503863	0.428523	0.487185	0.535381
0.722107	0.503843	0.537415	0.398376	0.420946	0.449175	0.552199	0.405323	0.417952
0.882985	0.490161	0.520209	0.380014	0.380963	0.376198	0.378202	0.389163	0.364027
0.80604	0.621653	0.689298	0.505369	0.49088	0.598494	0.525155	0.659395	0.534647
0.636166	0.464715	0.489449	0.376735	0.405374	0.468612	0.440964	0.506362	0.48873
0.72899	0.39816	0.380266	0.435206	0.409826	0.450616	0.445973	0.469455	0.388154
0.60042	0.501524	0.481682	0.429348	0.478828	0.513928	0.460653	0.519463	0.51664
0.949496	0.370865	0.385691	0.41003	0.388965	0.40242	0.536783	0.5315	0.381846
0.898441	0.467054	0.484314	0.398387	0.409469	0.520727	0.578464	0.403984	0.487945
0.655329	0.455936	0.55254	0.435072	0.442609	0.474616	0.525238	0.472875	0.406552
0.606637	0.429858	0.444255	0.462753	0.467168	0.421293	0.488158	0.458194	0.425063
0.683933	0.560216	0.603282	0.47761	0.485769	0.537032	0.52119	0.448129	0.520797
0.951189	0.599355	0.686775	0.55212	0.529061	0.538465	0.615339	0.53164	0.537994
0.674075	0.662803	0.731769	0.424386	0.391129	0.512909	0.553157	0.444221	0.50615
0.729427	0.426761	0.458693	0.431739	0.386706	0.484021	0.44405	0.42228	0.470718
0.65529	0.424952	0.435669	0.328149	0.445895	0.488065	0.539784	0.396961	0.545747
0.632098	0.453352	0.475771	0.429493	0.335221	0.435165	0.394062	0.415935	0.375454
0.732913	0.426587	0.392988	0.347412	0.394305	0.409301	0.467677	0.34962	0.368561
0.757545	0.578067	0.588418	0.391572	0.470596	0.535854	0.462476	0.503707	0.44645
0.766584	0.599936	0.591311	0.441295	0.441932	0.451915	0.535257	0.414807	0.437475
0.628253	0.495347	0.494065	0.43814	0.395226	0.470596	0.50699	0.447335	0.443084
0.728569	0.460236	0.531217	0.495201	0.412253	0.507807	0.515844	0.50484	0.474179
0.625316	0.459573	0.520874	0.387446	0.428564	0.483024	0.41403	0.400623	0.440988
0.574996	0.443004	0.435249	0.334818	0.388251	0.416441	0.44314	0.359348	0.377364
0.681018	0.503984	0.521859	0.366022	0.404681	0.502009	0.40711	0.447849	0.451477
0.632822	0.526115	0.647877	0.404525	0.373699	0.409843	0.43409	0.376985	0.458156
0.851333	0.403934	0.454491	0.318024	0.355277	0.514941	0.438914	0.284718	0.414089
0.886479	0.375122	0.409662	0.354995	0.351961	0.444054	0.504925	0.394437	0.346081
0.908797	0.48254	0.565225	0.395139	0.395893	0.501754	0.52123	0.432374	0.462289
0.796335	0.525064	0.51257	0.49092	0.425926	0.460507	0.504955	0.444809	0.421391
0.667112	0.643902	0.645901	0.494508	0.509448	0.559494	0.57565	0.468768	0.533021
0.851343	0.537843	0.586535	0.433644	0.440651	0.586571	0.59867	0.534678	0.613809
0.704551	0.391831	0.428389	0.358972	0.386847	0.459935	0.547868	0.352003	0.408019
0.820474	0.565779	0.577998	0.4421	0.43095	0.529249	0.509821	0.422281	0.547214
0.713499	0.563251	0.604659	0.446289	0.426089	0.453483	0.469164	0.429541	0.462059
0.763844	0.512117	0.53446	0.399711	0.446075	0.542927	0.487397	0.58564	0.430544
0.947867	0.446885	0.511243	0.426466	0.463555	0.476132	0.491598	0.398444	0.468349
0.877015	0.592031	0.594693	0.382999	0.441279	0.549865	0.443476	0.44572	0.453877
0.878325	0.436329	0.425771	0.380642	0.439756	0.496499	0.509973	0.384383	0.477599
0.909219	0.489283	0.57738	0.466267	0.456573	0.626782	0.552728	0.500869	0.539259
0.940228	0.521278	0.506705	0.480603	0.527184	0.558895	0.55118	0.514145	0.546709
0.888817	0.51974	0.495988	0.405064	0.466376	0.464647	0.535085	0.462135	0.440674
0.557032	0.386487	0.436953	0.375495	0.388029	0.37487	0.401952	0.361787	0.416674
0.623582	0.449034	0.538283	0.399292	0.35822	0.446581	0.476094	0.412809	0.429229
0.929096	0.651668	0.663732	0.476931	0.496027	0.66969	0.544347	0.51997	0.591422
0.47866	0.331319	0.438673	0.325564	0.335965	0.449478	0.399022	0.425339	0.347378
0.862458	0.494585	0.533455	0.470513	0.47244	0.422083	0.46875	0.493916	0.484887
0.5202	0.414365	0.426235	0.486617	0.412112	0.569781	0.483735	0.400924	0.458844
0.908709	0.580876	0.567521	0.425174	0.475681	0.494885	0.521116	0.541112	0.439678
0.732502	0.554277	0.577932	0.442861	0.437984	0.519682	0.629094	0.511708	0.42808
0.710686	0.365593	0.398055	0.375859	0.396938	0.395244	0.459368	0.305229	0.344061
0.658016	0.393734	0.390075	0.349774	0.340914	0.469518	0.403039	0.255969	0.340108
0.712814	0.462707	0.403913	0.380297	0.385165	0.51614	0.503887	0.331739	0.398996
0.680511	0.514861	0.5961	0.396675	0.396403	0.464692	0.486175	0.322245	0.464432
0.672924	0.516312	0.518877	0.424705	0.445675	0.433601	0.462637	0.469466	0.445994
0.645198	0.492903	0.533023	0.404505	0.404193	0.449903	0.485865	0.492479	0.43845
0.853205	0.487694	0.492944	0.472154	0.48874	0.539265	0.57088	0.620339	0.511796
0.75726	0.573867	0.595281	0.462553	0.404896	0.4238	0.567816	0.508116	0.422516
0.525766	0.435079	0.455836	0.382212	0.417633	0.436122	0.524171	0.424375	0.408305
0.52894	0.396524	0.426936	0.412674	0.413029	0.432787	0.430231	0.429585	0.44634
0.5836	0.454851	0.433062	0.405386	0.490105	0.494878	0.445736	0.391941	0.477192
0.610658	0.520337	0.580639	0.482221	0.493695	0.479327	0.487286	0.504626	0.488761
0.571575	0.545688	0.591906	0.418383	0.445926	0.597456	0.516148	0.457895	0.516529
0.608007	0.414455	0.466037	0.34106	0.355485	0.452783	0.495134	0.37016	0.399117
0.931331	0.561379	0.585178	0.449438	0.480014	0.462111	0.504686	0.501157	0.479716
0.745162	0.510212	0.570724	0.385852	0.380866	0.489275	0.529548	0.399736	0.480817
0.731308	0.52513	0.513691	0.427876	0.468693	0.569204	0.650908	0.527715	0.461234
0.950026	0.598526	0.662702	0.427358	0.417757	0.495915	0.410408	0.38688	0.45244
0.645133	0.43379	0.393537	0.457895	0.375048	0.39819	0.487487	0.391708	0.410467
0.879561	0.52132	0.565186	0.407088	0.417243	0.572191	0.571735	0.392995	0.495332
0.779472	0.383031	0.419919	0.354386	0.34938	0.42398	0.401983	0.41174	0.419374
0.663184	0.500693	0.537132	0.453136	0.422017	0.562772	0.451191	0.476969	0.463602
0.935179	0.506678	0.507534	0.425112	0.414729	0.436864	0.428741	0.45741	0.420934
0.573432	0.454598	0.487192	0.385405	0.370406	0.453217	0.454039	0.418608	0.446
0.552362	0.354297	0.366572	0.420783	0.385254	0.382764	0.425367	0.425562	0.379671
0.98295	0.550529	0.542029	0.374986	0.343392	0.466843	0.501557	0.462651	0.418225
0.899701	0.477585	0.50139	0.386673	0.387419	0.453131	0.487005	0.354869	0.38126
0.782136	0.521465	0.575159	0.382837	0.450363	0.521827	0.547013	0.434411	0.540532
0.817226	0.468097	0.544792	0.385398	0.392559	0.408328	0.450061	0.366337	0.388519
0.82669	0.45915	0.489484	0.374721	0.430576	0.498032	0.487788	0.48123	0.431905
0.897963	0.599215	0.669661	0.374482	0.49256	0.558111	0.556649	0.419573	0.527989
0.834919	0.372536	0.415862	0.400326	0.386325	0.482649	0.561168	0.371488	0.446128
0.62978	0.488033	0.536676	0.412763	0.457051	0.53394	0.508153	0.480271	0.506654
0.659945	0.426881	0.473325	0.319663	0.374382	0.416178	0.393216	0.354403	0.360271
0.621141	0.471609	0.488958	0.432751	0.435004	0.445167	0.456337	0.411275	0.433378
0.880595	0.554661	0.653189	0.341822	0.489553	0.591201	0.643557	0.436716	0.606177
0.788464	0.392112	0.415316	0.365008	0.366583	0.376094	0.439792	0.361026	0.448879
0.769594	0.519254	0.58749	0.415733	0.473826	0.537453	0.515145	0.438394	0.499272
0.633624	0.423453	0.473031	0.443806	0.391677	0.457216	0.461999	0.449498	0.468189
0.787989	0.496138	0.485416	0.532852	0.506196	0.533825	0.558461	0.591402	0.508287
0.630939	0.45835	0.454147	0.396412	0.343295	0.416594	0.444452	0.399621	0.44851
0.779034	0.450692	0.530104	0.392188	0.40327	0.451058	0.624483	0.401498	0.445755
0.533521	0.496085	0.494311	0.337018	0.367889	0.4895	0.44294	0.322629	0.41696
0.788692	0.467825	0.482234	0.340665	0.422256	0.537614	0.401944	0.543289	0.461844
0.701405	0.369123	0.350128	0.364014	0.316298	0.323472	0.36233	0.315326	0.369808
0.821247	0.474184	0.480175	0.41795	0.394732	0.465741	0.496048	0.432675	0.44365
0.785935	0.637138	0.649284	0.545127	0.517013	0.508639	0.617989	0.59525	0.56622
0.763242	0.646516	0.681768	0.540562	0.490892	0.55821	0.641595	0.536868	0.566898
0.849699	0.435943	0.421468	0.387082	0.431832	0.441116	0.418707	0.36556	0.415223
0.939526	0.555095	0.641712	0.433066	0.51311	0.636913	0.573997	0.560786	0.558482
0.882976	0.435105	0.45956	0.455875	0.422006	0.403252	0.464483	0.40125	0.478512
0.817384	0.628772	0.702004	0.58469	0.546694	0.590995	0.556908	0.633828	0.561793
0.814996	0.55698	0.614233	0.379734	0.469883	0.54307	0.605096	0.458355	0.523837
0.754459	0.38293	0.462154	0.41499	0.415255	0.408907	0.553055	0.431119	0.401119
0.758464	0.480301	0.541796	0.482083	0.425882	0.479815	0.537864	0.463952	0.555199
0.852786	0.512416	0.483757	0.36846	0.380686	0.497751	0.584886	0.347441	0.452121
0.543555	0.521264	0.520446	0.387607	0.373903	0.430131	0.363604	0.414856	0.421804
0.56903	0.41967	0.480686	0.360327	0.365664	0.376223	0.324231	0.34036	0.424807
0.689956	0.495982	0.495787	0.348254	0.408253	0.529366	0.525968	0.431746	0.402445
0.788586	0.48858	0.545854	0.452258	0.441692	0.58509	0.557603	0.502438	0.518076
0.856435	0.396349	0.425712	0.329881	0.407391	0.501237	0.374582	0.316213	0.43982
0.840966	0.531475	0.64321	0.3761	0.42377	0.607316	0.625082	0.381256	0.514079
0.567217	0.565017	0.579347	0.439119	0.4341	0.493726	0.493289	0.395813	0.531163
0.572537	0.438815	0.442934	0.329694	0.390613	0.452664	0.437124	0.378641	0.450602
0.618488	0.36851	0.432248	0.307975	0.311644	0.362817	0.41848	0.347827	0.362639
0.795206	0.550322	0.614769	0.454959	0.467952	0.590824	0.545715	0.436309	0.558799
0.743114	0.565369	0.615704	0.455391	0.525708	0.650589	0.601807	0.532637	0.573218
0.669535	0.454457	0.486039	0.452071	0.350206	0.407255	0.329559	0.532132	0.407877
0.947691	0.534509	0.533757	0.463518	0.443188	0.53192	0.508206	0.43777	0.476598
0.782844	0.422684	0.410346	0.352933	0.317283	0.336252	0.293238	0.299284	0.318586
0.599429	0.455069	0.46467	0.490664	0.476493	0.486116	0.492019	0.457265	0.477912
0.568098	0.440334	0.450803	0.391689	0.359208	0.473107	0.421265	0.337976	0.382535
0.865408	0.613568	0.645091	0.519422	0.497529	0.57601	0.55542	0.578611	0.553887
0.863178	0.4881	0.491956	0.371229	0.433106	0.511272	0.572968	0.438974	0.541057
0.921528	0.465352	0.469102	0.351128	0.361156	0.404504	0.449876	0.440723	0.414157
0.697745	0.46919	0.442139	0.399629	0.420169	0.474959	0.488362	0.401728	0.382707
0.665943	0.492823	0.545924	0.350664	0.326145	0.418241	0.514103	0.442868	0.363338
0.778431	0.376789	0.377915	0.343933	0.319701	0.318445	0.314807	0.425025	0.328631
0.792818	0.525613	0.492176	0.412393	0.448376	0.422018	0.478636	0.342437	0.437082
0.651996	0.485843	0.510042	0.473011	0.425929	0.476619	0.451263	0.553785	0.445327
0.955874	0.564085	0.600492	0.471773	0.470643	0.625837	0.553369	0.596262	0.541183
0.622159	0.42359	0.39015	0.339252	0.35906	0.436602	0.432311	0.303704	0.388335
0.685951	0.484346	0.467191	0.39827	0.453186	0.525565	0.571976	0.373575	0.468022
0.827479	0.408489	0.431844	0.360928	0.460215	0.568452	0.516556	0.411548	0.391179
0.968993	0.517848	0.608516	0.404362	0.426358	0.47555	0.478637	0.526806	0.453721
0.593486	0.48761	0.486197	0.441512	0.51383	0.504605	0.470034	0.445829	0.490526
0.896664	0.471954	0.512543	0.459728	0.458712	0.495353	0.493433	0.450153	0.47737
0.951589	0.64205	0.679234	0.43235	0.505655	0.640814	0.63227	0.509376	0.57586
0.52833	0.416934	0.392337	0.351652	0.353051	0.496146	0.36602	0.370545	0.409367
0.724074	0.464172	0.541631	0.44019	0.432862	0.48713	0.564427	0.512214	0.433988
0.781627	0.503967	0.619383	0.429229	0.374536	0.441028	0.38419	0.489367	0.417955
0.848109	0.535913	0.579644	0.487195	0.451415	0.560762	0.584959	0.49986	0.515674
0.655309	0.559723	0.658479	0.413777	0.433055	0.454076	0.523252	0.45322	0.436148
0.87252	0.572064	0.644249	0.357352	0.442856	0.510361	0.602854	0.487967	0.500446
0.670729	0.382989	0.413208	0.354278	0.404397	0.425496	0.428143	0.337439	0.381075
0.718094	0.314385	0.307631	0.333813	0.345247	0.33786	0.395481	0.445443	0.284772
0.73928	0.497344	0.468259	0.437263	0.430879	0.417109	0.52368	0.423649	0.479067
0.84957	0.519985	0.517839	0.369434	0.460591	0.569977	0.568481	0.401689	0.550033
0.921335	0.765734	0.783193	0.633357	0.615303	0.603734	0.725588	0.654905	0.67359
0.92065	0.786964	0.809861	0.708553	0.678967	0.675864	0.703567	0.675564	0.75152
0.947476	0.409119	0.413988	0.342362	0.462025	0.472596	0.53883	0.457779	0.432014
0.875786	0.464959	0.452819	0.463847	0.472565	0.487806	0.505213	0.517397	0.481366
0.702529	0.451693	0.457549	0.420738	0.384362	0.519949	0.49657	0.532086	0.491042
0.8482	0.499217	0.521407	0.462049	0.396189	0.404509	0.562316	0.398317	0.417423
0.95547	0.563156	0.623223	0.437212	0.489712	0.596104	0.709201	0.525422	0.557623
0.721984	0.415044	0.474654	0.403068	0.424817	0.488852	0.446351	0.479788	0.461208
0.959034	0.509267	0.549524	0.566715	0.437784	0.469293	0.607369	0.438124	0.516653
0.722722	0.41842	0.443754	0.369765	0.358638	0.370398	0.397458	0.432533	0.385412
0.639843	0.473216	0.478953	0.346384	0.365278	0.434627	0.450077	0.416919	0.339133
0.807373	0.422527	0.425141	0.412657	0.476503	0.556464	0.588221	0.415663	0.544311
0.801896	0.551443	0.603348	0.445396	0.472529	0.529908	0.519337	0.464129	0.540547
0.657625	0.672753	0.687034	0.459766	0.461673	0.531998	0.625131	0.48571	0.563632
0.774609	0.506536	0.58854	0.396035	0.398001	0.465218	0.48752	0.443601	0.539444
0.868789	0.548288	0.649557	0.530105	0.428579	0.648441	0.623389	0.485054	0.593642
0.784835	0.653657	0.646329	0.468511	0.453087	0.628338	0.59765	0.468599	0.529466
0.892229	0.506822	0.552892	0.396899	0.395467	0.388686	0.510919	0.330472	0.510599
0.728882	0.438085	0.4418	0.395711	0.397681	0.485497	0.462651	0.399723	0.457827
0.809377	0.420217	0.473016	0.425921	0.441663	0.458244	0.519361	0.442063	0.446348
0.890451	0.440565	0.424553	0.496098	0.500921	0.530587	0.535281	0.473803	0.45682
0.702318	0.585154	0.599445	0.458798	0.488549	0.469529	0.527843	0.436936	0.492708
0.712836	0.497176	0.548614	0.431368	0.407812	0.53676	0.618254	0.463641	0.449926
0.928516	0.508237	0.525881	0.389024	0.444309	0.529803	0.543857	0.414953	0.506168
0.669886	0.425831	0.436488	0.354844	0.307182	0.415544	0.43091	0.386558	0.383878
0.820987	0.599654	0.599736	0.52142	0.521449	0.465503	0.66885	0.592256	0.562011
0.804583	0.552204	0.541593	0.378163	0.416384	0.557003	0.574406	0.409121	0.470829
0.815083	0.539611	0.669938	0.402046	0.471678	0.59396	0.510743	0.476078	0.524109
0.844109	0.438615	0.513063	0.392766	0.480215	0.460882	0.60929	0.448238	0.425501
0.62467	0.329767	0.333983	0.310852	0.303939	0.313504	0.365441	0.307158	0.372323
0.703548	0.372593	0.38768	0.366483	0.318952	0.426243	0.275786	0.462192	0.379951
0.747697	0.403835	0.459494	0.386774	0.419766	0.462002	0.471705	0.410721	0.435037
0.922564	0.387993	0.489574	0.323885	0.380969	0.41086	0.544781	0.415866	0.305002
0.88175	0.441873	0.507369	0.430358	0.469973	0.491238	0.462862	0.442312	0.509734
0.583069	0.411462	0.422201	0.384714	0.362127	0.366345	0.450905	0.375118	0.362575
0.590792	0.409137	0.430298	0.377229	0.377998	0.419163	0.42162	0.322894	0.406237
0.714732	0.550428	0.676605	0.423435	0.428311	0.536359	0.56679	0.44802	0.463075
0.62414	0.360016	0.37424	0.348276	0.376908	0.406405	0.41943	0.37853	0.408162
0.685809	0.400194	0.385789	0.379787	0.383342	0.43456	0.518287	0.486817	0.432535
0.524764	0.390019	0.42633	0.378147	0.385276	0.43717	0.410856	0.425154	0.374653
0.923863	0.582167	0.549888	0.478542	0.485312	0.557086	0.540487	0.429577	0.48706
0.859946	0.550658	0.590921	0.493505	0.43832	0.438225	0.563831	0.423143	0.451321
0.625926	0.498961	0.523784	0.439731	0.434032	0.484573	0.537872	0.416118	0.484145
0.72151	0.580623	0.602997	0.408645	0.465198	0.502873	0.489757	0.373243	0.512327
0.683248	0.353871	0.339395	0.373456	0.428058	0.411168	0.526117	0.36106	0.322672
0.811181	0.339084	0.386037	0.309409	0.312818	0.411645	0.383332	0.36866	0.336389
0.79241	0.437782	0.427432	0.386155	0.420492	0.484148	0.485433	0.393155	0.397533
0.476835	0.289278	0.323163	0.32657	0.292739	0.332532	0.370916	0.298245	0.324722
0.912976	0.478652	0.45542	0.374735	0.405874	0.549318	0.437413	0.318449	0.378625
0.705847	0.508628	0.50185	0.366674	0.427412	0.436661	0.544065	0.420418	0.426086
0.769271	0.526063	0.525784	0.450874	0.415091	0.484784	0.517236	0.48871	0.447081
0.782985	0.480309	0.530234	0.409732	0.377525	0.482501	0.43684	0.397494	0.42582
0.688526	0.410635	0.490362	0.411475	0.422456	0.431016	0.503153	0.398888	0.420092
0.915048	0.494526	0.460841	0.347996	0.380544	0.449252	0.433473	0.375165	0.450633
0.933029	0.452197	0.502785	0.387827	0.383827	0.514266	0.547787	0.399113	0.385508
0.837788	0.489316	0.474556	0.449483	0.443656	0.557172	0.594956	0.507966	0.509301
0.944476	0.617341	0.593664	0.455338	0.428099	0.50735	0.547548	0.42493	0.451437
0.914943	0.470439	0.497274	0.448232	0.474185	0.428249	0.52438	0.345368	0.507003
0.962915	0.553194	0.620918	0.452931	0.482002	0.555678	0.566702	0.370194	0.524728
0.801159	0.514872	0.542927	0.440837	0.458755	0.486254	0.573238	0.434427	0.421895
0.788288	0.383485	0.381575	0.423061	0.41579	0.33487	0.448483	0.536301	0.424991
0.68295	0.411542	0.468905	0.339715	0.441925	0.496986	0.428893	0.414527	0.41048
0.530646	0.335491	0.372799	0.420285	0.383576	0.383044	0.314213	0.319629	0.344476
0.745549	0.495184	0.536652	0.463571	0.477624	0.520233	0.525141	0.569873	0.529892
0.506301	0.422341	0.400129	0.407304	0.404316	0.407276	0.617855	0.412071	0.427034
0.631097	0.423061	0.466131	0.381263	0.453034	0.444424	0.488572	0.375941	0.507082
0.954767	0.500043	0.576089	0.448683	0.378828	0.481159	0.565849	0.430544	0.514931
0.706582	0.48715	0.552746	0.470263	0.442592	0.454769	0.533615	0.472868	0.502111
0.789271	0.517645	0.515681	0.400739	0.382727	0.497021	0.541077	0.467408	0.446331
0.724246	0.435595	0.458462	0.321548	0.324834	0.4796	0.459334	0.337459	0.383088
0.917586	0.637628	0.67973	0.453514	0.444776	0.626957	0.574487	0.449977	0.547626
0.646795	0.52946	0.527497	0.381627	0.399978	0.446833	0.49414	0.447181	0.407681
0.750764	0.441813	0.470951	0.379955	0.365127	0.401004	0.453644	0.386101	0.365451
0.837445	0.540274	0.56924	0.376642	0.405903	0.50438	0.378638	0.519312	0.420391
0.56297	0.449809	0.462691	0.421695	0.384697	0.437215	0.397182	0.428964	0.371167
0.883547	0.466327	0.489384	0.423728	0.407505	0.467679	0.569526	0.425923	0.388399
0.9141	0.542108	0.59368	0.475661	0.498553	0.607327	0.535955	0.524189	0.551888
0.751418	0.412111	0.461078	0.384416	0.419984	0.477814	0.466198	0.460337	0.450711
0.742603	0.484939	0.55065	0.47525	0.423222	0.529845	0.51094	0.476526	0.472648
0.58155	0.401038	0.402121	0.370136	0.345649	0.414268	0.467046	0.403345	0.406593
0.912747	0.477874	0.49761	0.366837	0.414718	0.467744	0.478888	0.445108	0.463709
0.611817	0.423391	0.424005	0.359246	0.359443	0.440675	0.410359	0.369709	0.404854
0.61202	0.461147	0.456843	0.37174	0.330992	0.381932	0.431958	0.386305	0.394012
0.917208	0.442825	0.479037	0.407446	0.419835	0.508502	0.573991	0.367839	0.451686
0.925057	0.537415	0.642107	0.470713	0.465782	0.507127	0.471332	0.406736	0.490755
0.537029	0.403045	0.419114	0.389285	0.393918	0.357713	0.443241	0.394678	0.356278
0.79626	0.570044	0.624381	0.51067	0.438905	0.527819	0.530407	0.503162	0.536935
0.685057	0.4901	0.530077	0.391758	0.462111	0.440409	0.433908	0.391857	0.440611
0.726743	0.476787	0.468705	0.420119	0.408591	0.579722	0.548603	0.48706	0.467484
0.675417	0.531937	0.549228	0.451995	0.436202	0.593525	0.616861	0.519922	0.48064
0.775698	0.527666	0.540367	0.449991	0.459083	0.556967	0.517947	0.516583	0.538535
0.902501	0.444405	0.453819	0.428895	0.445351	0.486781	0.41246	0.542587	0.429332
0.692989	0.494652	0.559761	0.433804	0.439746	0.438789	0.601154	0.416235	0.420769
0.655558	0.345088	0.361693	0.355489	0.29893	0.352338	0.352662	0.387371	0.343852
0.773327	0.522986	0.531656	0.426928	0.522019	0.550979	0.566975	0.462588	0.564358
0.914823	0.576575	0.580369	0.530205	0.441035	0.49194	0.626346	0.501005	0.503133
0.806356	0.48937	0.4955	0.349355	0.417325	0.467444	0.502222	0.406445	0.440897
0.834346	0.667524	0.656872	0.312786	0.389691	0.531456	0.457764	0.38361	0.490784
0.764829	0.372298	0.419345	0.348862	0.293635	0.401886	0.399088	0.426037	0.394409
0.889552	0.469118	0.490659	0.434371	0.401351	0.482472	0.546599	0.434389	0.51707
0.747252	0.428976	0.408662	0.361626	0.381319	0.466986	0.463931	0.382011	0.364081
0.8718	0.520953	0.552164	0.44406	0.476038	0.592842	0.498768	0.436963	0.494482
0.902493	0.464295	0.500678	0.374443	0.425684	0.494643	0.449932	0.464051	0.458434
0.578297	0.519865	0.506978	0.39597	0.441864	0.431894	0.398226	0.519044	0.331879
0.703405	0.56019	0.588218	0.355414	0.384874	0.572546	0.470489	0.360343	0.439283
0.780585	0.454957	0.469265	0.403124	0.434576	0.521327	0.590845	0.433847	0.463318
0.879656	0.462619	0.478064	0.44501	0.449727	0.53718	0.53758	0.413552	0.426368
0.845004	0.613057	0.670062	0.434379	0.542556	0.645542	0.540503	0.507408	0.520782
0.668112	0.422426	0.437553	0.390132	0.381875	0.451845	0.4864	0.437385	0.409613
0.815473	0.448712	0.439466	0.37631	0.347677	0.439564	0.546182	0.398085	0.419035
0.780817	0.520637	0.540581	0.386813	0.465249	0.464756	0.528583	0.459378	0.498908
0.917787	0.549964	0.574864	0.502254	0.49631	0.497461	0.479946	0.375707	0.562024
0.658343	0.327492	0.376062	0.333818	0.345095	0.343483	0.369358	0.313795	0.323513
0.634381	0.403012	0.409331	0.369275	0.337163	0.384618	0.378003	0.385023	0.391143
0.748083	0.584914	0.662536	0.40491	0.493112	0.59056	0.48632	0.527394	0.509735
0.852362	0.48217	0.513452	0.452582	0.425669	0.541083	0.646163	0.423737	0.511922
0.890342	0.459708	0.478884	0.381627	0.409893	0.544205	0.548657	0.498906	0.484431
0.826163	0.39152	0.445265	0.406342	0.414188	0.412143	0.458964	0.380496	0.467833
0.809854	0.547914	0.665832	0.435184	0.488597	0.641408	0.617279	0.435359	0.568879
0.889079	0.455401	0.410092	0.369211	0.351255	0.563162	0.564141	0.491267	0.452745
0.573158	0.492506	0.510373	0.508338	0.472156	0.511753	0.584691	0.462772	0.533062
0.780221	0.405919	0.489134	0.452402	0.461037	0.444652	0.519941	0.402114	0.479202
0.810024	0.503244	0.516071	0.460851	0.474194	0.417108	0.505595	0.509904	0.504979
0.766511	0.446841	0.437297	0.394307	0.482134	0.480653	0.436959	0.426832	0.436909
0.810641	0.309921	0.319175	0.390546	0.362337	0.450134	0.579054	0.318838	0.426894
0.920053	0.598408	0.643847	0.4613	0.465854	0.552267	0.567853	0.433005	0.504416
0.615521	0.454581	0.519938	0.404841	0.350995	0.445833	0.488039	0.436915	0.448288
0.968867	0.562276	0.61718	0.502728	0.470908	0.581888	0.614967	0.566397	0.601376
0.869535	0.666955	0.735753	0.497258	0.507715	0.561095	0.602617	0.661269	0.560354
0.859982	0.519834	0.511383	0.401646	0.426026	0.575801	0.508918	0.437101	0.460665
0.89914	0.548653	0.669702	0.407541	0.484636	0.471046	0.579454	0.47049	0.568918
0.713152	0.458964	0.496928	0.39845	0.419304	0.499588	0.480591	0.373386	0.420532
0.652886	0.444611	0.440813	0.321941	0.324247	0.357249	0.38514	0.454858	0.37186
0.63928	0.335676	0.370166	0.340966	0.382327	0.497556	0.299169	0.399777	0.386059
0.784052	0.581124	0.610037	0.441234	0.464732	0.561181	0.596717	0.474334	0.53028
0.785391	0.621689	0.66286	0.435318	0.440041	0.56497	0.527242	0.484505	0.454638
0.684912	0.368609	0.409127	0.441771	0.450453	0.490671	0.476172	0.481112	0.439224
0.973521	0.575169	0.668811	0.418455	0.477979	0.620131	0.587749	0.422786	0.538829
0.787006	0.523616	0.570043	0.417768	0.449001	0.512876	0.456332	0.47352	0.445523
0.777226	0.45915	0.481413	0.358072	0.357016	0.54612	0.566765	0.352405	0.470831
0.96655	0.664954	0.732718	0.496796	0.488199	0.633699	0.617484	0.434636	0.585425
0.913679	0.453406	0.478242	0.420026	0.415725	0.41767	0.499049	0.3666	0.384709
0.742205	0.547535	0.566834	0.311981	0.364486	0.555169	0.519489	0.35753	0.539345
0.897085	0.640191	0.660629	0.415451	0.443209	0.561526	0.489516	0.396044	0.539292
0.818648	0.395395	0.401279	0.380458	0.415066	0.47101	0.527869	0.390304	0.39287
0.884327	0.31507	0.327812	0.398052	0.421163	0.441477	0.410938	0.377637	0.439027
0.84583	0.488589	0.471569	0.414725	0.424689	0.420877	0.41075	0.563428	0.43027
0.887112	0.56956	0.622458	0.541295	0.491064	0.580111	0.556775	0.510601	0.594618
0.725982	0.593883	0.62988	0.35396	0.383939	0.5121	0.493519	0.351239	0.469783
0.799561	0.455301	0.466613	0.393773	0.440863	0.439186	0.51684	0.454549	0.44854
0.792116	0.374893	0.420675	0.388235	0.354533	0.420654	0.427302	0.36732	0.327802
0.85821	0.522948	0.603263	0.439689	0.438778	0.46925	0.539316	0.46099	0.488612
0.95066	0.381673	0.455279	0.385329	0.407417	0.414864	0.495633	0.376373	0.405794
0.937665	0.332451	0.37964	0.306283	0.38731	0.48118	0.455834	0.380387	0.401423
0.692081	0.519928	0.51507	0.43742	0.453384	0.55061	0.525338	0.495015	0.482231
0.559927	0.444923	0.502566	0.45749	0.415066	0.50233	0.458108	0.465269	0.48979
0.806181	0.524057	0.56947	0.437921	0.420589	0.531034	0.529197	0.417244	0.412348
0.617138	0.343316	0.348089	0.281164	0.29739	0.303735	0.306138	0.362636	0.289625
0.833418	0.552907	0.593466	0.413229	0.375391	0.471162	0.531659	0.378115	0.412235
0.95101	0.615082	0.596206	0.476837	0.476287	0.525417	0.552901	0.49303	0.490872
0.787916	0.4475	0.436638	0.348933	0.447335	0.559608	0.521849	0.393667	0.465569
0.812692	0.50576	0.481793	0.433582	0.466229	0.517546	0.538185	0.575614	0.521439
0.703828	0.461091	0.489349	0.40208	0.41183	0.522744	0.529386	0.38873	0.391419
0.827831	0.590625	0.621583	0.524711	0.49517	0.538419	0.625005	0.544743	0.517807
0.856734	0.522861	0.541249	0.450234	0.437757	0.51203	0.555592	0.493574	0.548694
0.81935	0.517593	0.530485	0.330244	0.432914	0.557214	0.522318	0.323124	0.503933
0.446725	0.372987	0.333887	0.307947	0.285717	0.386816	0.302259	0.375551	0.328888
0.860896	0.434348	0.423121	0.415463	0.413479	0.412975	0.438292	0.402566	0.424504
0.833679	0.585689	0.623854	0.429615	0.479436	0.534665	0.492156	0.458243	0.515988
0.57698	0.436283	0.448646	0.370417	0.407746	0.465917	0.36694	0.456253	0.4116
0.828357	0.54531	0.61355	0.435959	0.45633	0.503181	0.464903	0.543226	0.504582
0.925408	0.456851	0.439571	0.493268	0.453822	0.451161	0.510128	0.389553	0.462614
0.559428	0.465703	0.455795	0.365297	0.351645	0.350834	0.407535	0.357218	0.365897
0.964056	0.460445	0.523449	0.404963	0.451485	0.609028	0.559136	0.412154	0.568081
0.74347	0.380689	0.421718	0.371666	0.397443	0.457212	0.365413	0.305121	0.396869
0.821984	0.493136	0.462351	0.37333	0.360851	0.464863	0.458443	0.411854	0.451117
0.766901	0.551373	0.585067	0.475713	0.470274	0.588651	0.603746	0.469465	0.556444
0.853503	0.475915	0.444993	0.400947	0.44729	0.494024	0.433449	0.375062	0.428688
0.858929	0.477832	0.524984	0.396516	0.468705	0.534947	0.524851	0.445351	0.557702
0.702213	0.474998	0.464499	0.338895	0.385735	0.372305	0.467825	0.377311	0.41088
0.828908	0.488227	0.542011	0.426482	0.449269	0.534215	0.448788	0.464522	0.48287
0.631933	0.359227	0.396313	0.350417	0.348535	0.440179	0.380805	0.36304	0.45229
0.900369	0.662686	0.670541	0.649989	0.59358	0.575815	0.592884	0.619112	0.655032
0.865566	0.679157	0.729979	0.603997	0.535523	0.588036	0.577127	0.612467	0.535822
0.623106	0.442029	0.475274	0.445099	0.498578	0.449051	0.540359	0.506922	0.397146
0.934662	0.498928	0.508977	0.378705	0.415472	0.468021	0.585216	0.448767	0.399849
0.847428	0.540016	0.57191	0.487513	0.490364	0.617969	0.535811	0.532846	0.53687
0.799779	0.682781	0.667683	0.588878	0.599509	0.595383	0.736677	0.564304	0.660854
0.879596	0.487039	0.568249	0.449579	0.490947	0.503495	0.564026	0.494948	0.495501
0.74216	0.316094	0.324463	0.365037	0.399229	0.418102	0.338082	0.329813	0.362648
0.82599	0.427126	0.453783	0.388567	0.360717	0.424861	0.514621	0.403086	0.406664
0.85036	0.461383	0.412044	0.422867	0.381689	0.33169	0.474082	0.407036	0.377782
0.711081	0.351847	0.397618	0.379303	0.357372	0.446333	0.380025	0.363463	0.394501
0.688393	0.493163	0.563384	0.403842	0.414973	0.457535	0.438579	0.36209	0.474122
0.744384	0.582335	0.561825	0.368221	0.310991	0.441131	0.513427	0.437725	0.357144
0.580415	0.425561	0.424033	0.353154	0.384933	0.479298	0.520145	0.377379	0.385195
0.565294	0.533735	0.509969	0.396536	0.397622	0.403005	0.560282	0.440789	0.427272
0.635733	0.429057	0.476348	0.426218	0.369711	0.501576	0.493015	0.367779	0.428606
0.878578	0.518289	0.481584	0.498538	0.497082	0.489378	0.559751	0.520291	0.504514
0.933907	0.477438	0.482487	0.374765	0.423661	0.520076	0.436251	0.531225	0.516718
0.774808	0.587711	0.613168	0.495085	0.487969	0.525135	0.489628	0.529621	0.511862
0.585711	0.5148	0.565057	0.37487	0.400513	0.500978	0.463976	0.420119	0.48999
0.835838	0.41425	0.399198	0.410422	0.436244	0.404718	0.42955	0.37737	0.439549
0.939684	0.509702	0.549721	0.482676	0.489644	0.479935	0.536821	0.519485	0.514159
0.5718	0.330201	0.337545	0.34309	0.304871	0.357914	0.316603	0.331977	0.360134
0.521134	0.371087	0.38281	0.429448	0.408739	0.46407	0.480321	0.447842	0.398047
0.704529	0.373609	0.403194	0.403749	0.405089	0.404636	0.432932	0.460183	0.365268
0.792959	0.558941	0.536284	0.482682	0.449183	0.471869	0.585643	0.377025	0.563149
0.596435	0.437907	0.457862	0.347585	0.331752	0.498016	0.419468	0.365403	0.369307
0.848134	0.463095	0.500743	0.379408	0.414362	0.460083	0.444202	0.405369	0.455252
0.809903	0.623506	0.646157	0.414745	0.366978	0.442082	0.482208	0.421946	0.405722
0.803677	0.391399	0.388569	0.364519	0.32878	0.373641	0.441573	0.367028	0.371718
0.828425	0.493931	0.51634	0.386615	0.42174	0.4955	0.510695	0.38257	0.447246
0.868832	0.401629	0.46682	0.4104	0.398112	0.510301	0.510487	0.401696	0.448893
0.692643	0.405461	0.414238	0.350598	0.399066	0.443843	0.486882	0.380862	0.435676
0.729693	0.431879	0.456434	0.340523	0.388006	0.546978	0.452833	0.391021	0.540742
0.706096	0.472416	0.530531	0.407592	0.446579	0.475978	0.582126	0.473731	0.473915
0.622723	0.305941	0.328133	0.289512	0.36128	0.498047	0.491149	0.334438	0.497747
0.810652	0.431005	0.463705	0.44568	0.392671	0.424336	0.490954	0.465881	0.431075
